# Voxel-level forecast system for lesion development in patients with COVID-19

Cheng Jin<sup>1, \*</sup>, Yongjie Duan<sup>1, \*</sup>, Yukun Cao<sup>2, 3, \*</sup>, Jinyang Yu<sup>1</sup>, Zhanwei Xu<sup>1</sup>, Weixiang Chen<sup>1</sup>, Xiaoyu Han<sup>2, 3</sup>, Jia Liu<sup>2, 3</sup>, Jie Zhou<sup>1</sup>, Heshui Shi<sup>2, 3, ✉</sup>, and Jianjiang Feng<sup>1, ✉</sup>

## Abstract

The global spread of COVID-19 seriously endangers human health and even lives. By predicting patients' individualized disease development and further performing intervention in time, we may rationalize scarce medical resources and reduce mortality. Based on 1337 multi-stage ( $\geq 3$ ) high-resolution chest computed tomography (CT) images of 417 infected patients from three centers in the epidemic area, we proposed a random forest + cellular automata (RF+CA) model to forecast voxel-level lesion development of patients with COVID-19. The model showed a promising prediction performance (Dice similarity coefficient [DSC] = 71.1%, Kappa coefficient = 0.612, Figure of Merit [FoM] = 0.257, positional accuracy [PA] = 3.63) on the multicenter dataset. Using this model, multiple driving factors for the development of lesions were determined, such as distance to various interstitials in the lung, distance to the pleura, etc. The driving processes of these driving factors were further dissected and explained in depth from the perspective of pathophysiology, to explore the mechanism of individualized development of COVID-19 disease. The complete codes of the forecast system are available at [https://github.com/keyunj/VVForecast\\_covid19](https://github.com/keyunj/VVForecast_covid19).

---

<sup>1</sup>Department of Automation, Beijing National Research Center for Information Science and Technology, Tsinghua University, Beijing, China. <sup>2</sup>Department of Radiology, Union Hospital, Tongji Medical College, Huazhong University of Science and Technology, Wuhan, China. <sup>3</sup>Hubei Province Key Laboratory of Molecular Imaging, Wuhan, China. \*These authors are co-first authors: Cheng Jin, Yongjie Duan, Yukun Cao. ✉ These authors are co-corresponding authors: Jianjiang Feng (jfeng@tsinghua.edu.cn) and Heshui Shi (heshuishi@hust.edu.cn).  
NOTE: This preprint reports new research that has not been certified by peer review and should not be used to guide clinical practice.

## 1 Introduction

2 The outbreak of COVID-19 has put enormous pressure on global health services. The World  
3 Health Organization has classified COVID-19 as a pandemic<sup>1</sup>. The development of infected  
4 patient's condition is rapid and unpredictable. Some patients can progress to a severe or critical  
5 state within 48 hours<sup>2</sup>. About 15% of COVID-19 infections in Wuhan, China, were reported to  
6 be severe<sup>3</sup>. Recent reports indicated that case fatality rate is of over 55% among critical cases,  
7 which rises sharply with age and underlying comorbid diseases<sup>4</sup>. The progression to severe  
8 disease has brought great pressure to medical services, resulting in the failure of timely  
9 allocation of intensive care resources, which further brings great risks to patients' lives. Early  
10 and accurate assessment of disease dynamics and prediction of disease trends is critical, since  
11 timely intervention treatment can effectively reduce the occurrence of severe diseases and  
12 improve the prognosis of patients.

13 Various laboratory indicators have been used to assess the severity of the patients with  
14 infectious pneumonia and to guide clinical interventions, such as neutrophils lymphocyte ratio  
15 (NLR)<sup>5-7</sup>, lactic acid and D-dimer level<sup>8,9</sup> etc. Researchers also adopt acute physiology and  
16 chronic health evaluation (APACHE-II) score system to predict the prognosis of acute  
17 respiratory distress syndrome (ARDS)<sup>9</sup>. These existing methods attempt to explore the  
18 relevance between some biomarkers and the severity of the disease on a population level, which  
19 are insufficient to predict the specific development of pulmonary lesions.

20 Chest imaging, especially CT scan, is important for the diagnosis and management of COVID-  
21 19 patients. High resolution CT scan (HRCT) objectively demonstrates pulmonary lesions and  
22 enables us to better understand the pathogenesis of the disease. Various studies have been  
23 conducted to diagnose, detect and segment the COVID-19 lesions using CT scans<sup>10-14</sup>. Also,  
24 through serial CT examinations, the evolution of the disease can be observed and understood<sup>15-  
25 18</sup>. It is of more clinical significance to predict future trend of lesion development than to  
26 analyze the development in the past<sup>16,19,20</sup>. Up to now, however, chest CT based prognostic  
27 models mainly focus on predicting whether a patient will progress to severe disease or not<sup>7,16</sup>,  
28 which is a two-class classification problem. The voxel-level development prediction of  
29 pneumonia lesions has not been explored in previous studies. It is a much more challenging  
30 task due to limited number of CT examinations, large and unequal examination intervals, rapid  
31 and changeable lesion development, etc. Besides, the development of pulmonary infection  
32 varies significantly from patient to patient, and even from lobe from lobe.

33 In this study, we retrospectively analyzed evolution rules of lesions based on multi-stage chest  
34 CT images of 417 COVID-19 patients from three centers and proposed an artificial intelligence  
35 (AI) system to forecast the development of lesions in the three-dimensional space. The problem  
36 caused by uneven intervals between multi-stage CT examinations was overcome by the fusion  
37 of spatio-temporal information. Additionally, by measuring the driving factors of lesion  
38 evolution, the pathogenesis of COVID-19 was explained, and the time course of lesion  
39 absorption and expansion was tracked and analyzed.

## 1 **Result**

### 2 **Datasets for system development and evaluation**

3 A total of 2877 3D CT volumes of 1505 patients with COVID-19 were collected from three  
4 centers in Wuhan from February 5 to April 27, 2020. Because the forecast system was trained  
5 by the dynamic changes between the 1<sup>st</sup> and 2<sup>nd</sup> stage CT volumes and then validated using the  
6 3<sup>rd</sup> or later stage, only patients with at least three stages of CT volumes were selected. We  
7 screened out 636 patients with single stage and 452 patients with 2 stages, and finally obtained  
8 417 patients with at least 3 stages. Therefore, 1337 CT volumes from 417 patients were used  
9 for evaluating our proposed forecast system for lesion development (detailedly described in  
10 Methods and **Extended data | Table 1**).

11

### 12 **Construction of the AI System for lesion forecast**

13 Lesions in CT of COVID-19 patients are classified into two major types: ground-glass opacity  
14 (GGO) and consolidation. GGO is defined as an area with slightly and homogeneously  
15 increased in density that does not obscure underlying vascular markings. The consolidation  
16 component is defined as an irregular opaque area that completely blurs the underlying vascular  
17 markings.

18 We developed an AI system, which directly took two-stage CT data as input to perform voxel-  
19 level forecast of lesion development. The system consists of four parts: data pre-processing,  
20 lung registration, driving factor generation, and lesion development simulation. Firstly, three  
21 deep learning models were developed to extract three segmentation masks, i.e. a 3D  
22 convolutional neural network (CNN) for segmenting the left and right lung into five lobes on  
23 all CT scans, a 2.5D CNN for extracting various tubular adjacent interstitials (TAI) including  
24 bronchial bundles, vascular bundles, central lobular stroma, and a semi-automatic method for  
25 segmenting the lesion regions. Secondly, all CT scans from the same patient were cropped and  
26 then aligned to the first stage CT volume based on the extracted lobe masks, using rigid  
27 transformation and non-linear B-spline transformation. Thirdly, we extracted three additional  
28 driving factors related to lesion development, including the distance map to the margin of lobe  
29 mask, distance map to the center of lesion mask, and distance map to the centerline of TAI.  
30 Finally, the lesion regions in the third and subsequent stages were predicted based on the  
31 extracted information from previous two stages.

32 In the abovementioned final part, three voxel-level lesion development forecast models are  
33 proposed: recurrent neural network driven by normal distribution over time (RNN-NDT),  
34 recurrent neural network driven by normal distribution over time + cellular automaton (RNN-  
35 NDT+CA), and random forest classification + cellular automaton (RF+CA). Based on  
36 empirical test, the third model (RF+CA) with the best performance was selected to perform the  
37 whole study. The workflow of this machine-learning based forecast system is shown in **Figure**  
38 **1** and **Extended data | Figure 1**.

## 1 Performances of forecast system

### 2 Spatio-temporal pattern analysis

3 To validate the proposed forecast model, we compared the simulation results with the actual  
4 lesion distribution in the corresponding stage. **Figures 2** and **3** are comparisons between the  
5 simulated results obtained by the proposed model and the actual lesions of two patients. The  
6 two patients' conditions were severe and non-severe, respectively. From the follow-up records,  
7 the pulmonary lesions in the severe patient progressed rapidly and this patient was eventually  
8 admitted to the intensive care unit (ICU). The non-severe patient was eventually discharged  
9 with a better health condition. It can be found that the overall spatial distribution of lesions in  
10 the simulation results is close to the real situation in the 3<sup>rd</sup> stage CT image. The predicted  
11 lesion development status in the next 5 and 10 days indicates that multiple lesions are scattered  
12 in the lung of the patient in **Figure 2**. Although consolidation area has shrunk, the GGO area  
13 has expanded, and more lesions have evolved in the right inferior lobe and the left inferior lobe.  
14 The forecast result indicates that the patient would develop into a severer condition. In **Figure**  
15 **3**, the patient's lesion area will become more compact in the next 5 and 10 days according to  
16 the prediction result. Although consolidation area has expanded, the area of GGO has  
17 significantly reduced, and lots of obvious cord signs have been formed. Although several lesion  
18 areas have indeed expanded, some straight consolidation cords have appeared on the borders  
19 of lung (**Extended data | Figure 2, 3**), indicating a trend of improvement in the future<sup>21</sup>.

20 **Figure 4a, b** demonstrate the trend curve of whole lesion volume development in five  
21 pulmonary lobes of these two patients. The lesion development in different pulmonary lobes  
22 of the same patient shows different trends. **Figure 4c** shows the Sankey diagrams visualizing  
23 the conversion pattern between the three types of areas (normal area, GGO, and consolidation)  
24 in the lung of the severe case. In the progression from the 3<sup>rd</sup> CT examination to the 5<sup>th</sup> day  
25 after, approximately 12.79% (535.70 cm<sup>3</sup>) of the lungs of this severe patient has undergone  
26 intensive lesion evolution. As for the flow-out process, normal area is the category with the  
27 largest volume loss (131.39 cm<sup>3</sup>), most of which has evolved into GGO. A large portion of  
28 consolidation (85.64 cm<sup>3</sup>) has become normal. A small amount of GGO (21.83 cm<sup>3</sup>) has  
29 evolved into consolidation. As for the flow-in process, GGO is the category with the largest  
30 volume gain (111.20 cm<sup>3</sup>), indicating that GGO grows at a higher speed and tends to be more  
31 stable than other types. In the progression from the 5<sup>th</sup> to 10<sup>th</sup> day after the 3<sup>rd</sup> CT examination,  
32 approximately 14.53% of the lung area (608.46 cm<sup>3</sup>) of this patient has undergone intensive  
33 lesion evolution. As for the flow-out process, the normal area remains to be the largest volume  
34 loss category (147.95 cm<sup>3</sup>). Most of the loss has evolved into GGO (125.01 cm<sup>3</sup>). A small part  
35 of consolidation has evolved into normal area (40.09 cm<sup>3</sup>). As for the flow-in process, GGO is  
36 the category with the largest gains (136.01 cm<sup>3</sup>), indicating that GGO grows at a higher speed  
37 and tends to be more stable than other types.

## 1 Accuracy of voxel-level lesion development forecast models

2 Three forecast models, RF+CA, RNN-NDP and RNN-NDP+CA, were developed in this study.  
3 To quantitatively evaluate their prediction performance, the evolution of lesions in each patient  
4 was compared with actual lesions at corresponding stage point by point. Patients were divided  
5 into three cohorts corresponding to three different hospitals and each cohort contained 245, 78  
6 and 104 patients, respectively. The development of the whole lesion region, GGO subregion  
7 and consolidation subregion were evaluated, and the resulting confusion matrix is shown in  
8 **Table 1a**. DSC of 71.1, Kappa of 0.612, FoM of 0.257, and PA of 3.63 were obtained in the  
9 dataset consisting of Cohort 1, 2 and 3 for RF+CA model. DSC of 65.5, Kappa of 0.567, FoM  
10 of 0.249, and PA of 5.16 were obtained in the dataset consisting of Cohort 2 and 3 for deep  
11 leaning with normal distribution prior model; DSC of 70.2, Kappa of 0.610, FoM of 0.214, and  
12 PA of 4.35 were obtained in the dataset consisting of Cohort 2 and 3 for DNN+CA. Due to the  
13 small proportion of lesion and scattered distribution of consolidation region in the whole lung,  
14 the prediction accuracy of all models including RF+CA is not sufficiently high. However, the  
15 RF+CA model has better reliability and higher accuracy than the other two models, especially  
16 in terms of Kappa and FoM coefficients, indicating that the RF+CA model is more suitable for  
17 the prediction of lesion development. In the following study, we use only the RF+CA model.

## 18 Subset analysis

19 Most of the patients included in this study recorded clinical information such as BMI and  
20 underlying diseases. For an in-depth understanding of the lesion development forecast system  
21 and characteristics of different population with COVID-19, we further evaluated the proposed  
22 model on six subsets of test cohorts based on gender, age ( $\leq 50$  and  $> 50$  years), the interval  
23 between 2<sup>nd</sup> and 3<sup>rd</sup> CT examinations ( $\leq 7$  days and  $> 7$  days), BMI (body mass index,  
24 underweight [ $\leq 18.5$ ], normal weight and overweight [ $18.5 \sim 29.9$ ], obesity [ $\geq 30$ ]), whether  
25 suffering from underlying diseases (diabetes, hypertension, cardiovascular disease, cancer,  
26 chronic kidney disease, etc.), and whether in a critical condition<sup>22</sup>. **Extended data | Table 1**  
27 lists the distribution of patients in the six subsets. **Table 1b** shows DSC, Kappa, FoM, and PA  
28 for the six subsets.

## 1 **Driving factors of lesion evolution**

2 After training the random forest, the out-of-bag data can be used to measure the importance of  
3 each driving factor. As shown in **Figure 5a**, the distance map from the margin of lung region  
4 and that from centerlines of various TAI (blood vessels, micro bronchiole, intralobular septum,  
5 interlobular septum, etc.) have the greatest impact on the prediction accuracy. Multi-stage  
6 images of some patients are shown in **Figure 5b** and **Extended data | Figure 2,3**. The “3D+t”  
7 animation was further reconstructed and shown in **Lesion development of the patients with**  
8 **COVID-19.mov**. The most important driving factor is the distance to the lung margin, which  
9 is shown on the left of **Figure 5b** and **Extended data | Figure 2**. The second most important  
10 one is the distance to TAI centerline, which is shown on the right of **Figure 5b** and **Extended**  
11 **data | Figure 3**.

## 1 Discussion

2 The prediction of lesion evolution is of major interest to COVID-19 management. The forecast  
3 of potential lesion growth could alert clinicians and help in early recognition of development  
4 of disease. It is particularly important for COVID-19 since some patients, including those who  
5 are young and previously healthy, can go from fine to flailing in the short term<sup>23</sup>. Take as an  
6 example the reaction case of Wenliang Li, a young Chinese doctor, called a cytokine storm<sup>24</sup>.  
7 According to the forecast of lesion development and clinical manifestations of patients,  
8 targeted treatment in advance may greatly reduce the mortality rate.

9 The development of COVID-19 lesions is a complex nonlinear process. To find the best  
10 possible forecast model, three predictive models were established for comparison. The RF+CA  
11 model obtained the best accuracy and consistency ( $Kappa_{3^{rd}} = 0.612$ ,  $FoM_{3^{rd}} = 0.257$ ) in  
12 multicenter data. From the perspective of landscape pattern, PA indicates the localization  
13 precision of lung lesion. RF+CA yielded a smaller PA ( $PA_{3^{rd}} = 3.63$ ), which was superior to  
14 the other two methods. These results indicate that RF+CA can accurately mine the law of lesion  
15 development under large-scale simulations. It improves single-voxel calculation by focusing  
16 on the key spatial driving factors and the influence of cell neighborhood. The lesion  
17 development presents different mechanisms among different patients and even different lung  
18 lobes, which are ignored in the other two deep learning-based methods. In addition, the random  
19 forest method can also measure the importance of each driving factor according to its  
20 contribution to the prediction, which helps to explain the role of each driving factor in the lesion  
21 development. Parallel construction of random forest can greatly reduce its training time.  
22 Therefore, the CA model based on random forest has the advantages of high accuracy, fast  
23 training, and good interpretability. In the follow-up sections of this study, the proposed method  
24 refers to RF+CA.

25 Based on the proposed forecast model, we explored driving factors that affect the development  
26 of the lesion anatomically, and further carried out image description and pathophysiological  
27 explanation for specific patients. The proposed lesion development forecast system is of  
28 prompt value for disease development evaluation and prognosis, as well as for the pathogenesis  
29 of COVID-19. From the perspective of imaging alone, by simulating and forecasting more  
30 multi-stage CT images of COVID-19 patients, dynamic analysis of radiological characteristics  
31 in the long course of the disease can be performed in a predictable manner at the early stage of  
32 the disease, and major imaging markers belonging to phenotypic characteristics that distinguish  
33 mild and severe diseases can be identified (One of the applications of this forecast system for  
34 lesion development system. See the section on radiomics analysis of the long course of disease  
35 in supplementary materials for details.).

36 In this study, we conclude that the distance from the lung margin (**Figure 5a, b**) is the major  
37 driving factor for the transformation of non-lesion regions into lesion regions. Because the  
38 peripheral subpleural pulmonary lobules are better developed, blood flow and lymphatic are  
39 abundant, and the corresponding lobular interstitial inflammatory reaction is more obvious, the  
40 distribution pattern is mainly subpleural<sup>25-27</sup>. The unique pattern of growth of COVID-19  
41 lesions is parallel to pleural spread, that is, the stripe pattern is parallel to the pleura (**Extended  
42 data | Figure 2, 3**). The growth mechanism is presumed to be: Severe acute respiratory  
43 syndrome 2 (SARS CoV-2) virus invades lobular interstitium. When the peri-lobular stroma is  
44 mainly invaded, that is, the peri-alveolar stroma, this part of the lymphatic drainage direction  
45 is subpleural and interlobular septum<sup>25</sup>. The spread is also mainly around, diffusing to the  
46 pleura side and both side of the interlobular space. Because the distal end is restricted by the

1 pleura, the lesion growth can only be close to the pleura, spreading to both sides along the edge  
2 of the interlobular septum of mesh structure. The mutual fusion of the subpleural lesions causes  
3 the long axis of the lesion to be parallel to the pleura<sup>28</sup>. With the continuation of the disease,  
4 the lesions show a spreading trend from peripheral to centra. Two growth modes of lobular  
5 core interstitial and subpleural fuse together and gradually spread to most areas of the lung lobe  
6 and even diffuse to both lungs ("white lung")<sup>29</sup>. Another major factor is the distance to various  
7 interstitium (TAI centerline) (**Figure 5a, b**). It is intuitive that the virus first invades the  
8 bronchiole, causing bronchiolitis and peripheral inflammation. Then the virus spreads along  
9 various interstitials, and finally spreads to the lung parenchyma<sup>30</sup>. The thickening of the  
10 interlobular interstitial cord sign and fine mesh sign (crazy paving appearance) confirm that the  
11 growth of the virus mainly involves the interstitium of the lobules<sup>31</sup>. The interstitium in the  
12 lung includes the axial interstitium and the surrounding interstitium. The axial stroma includes  
13 bronchial bundles, vascular bundles, lymphatic vascular bundles, and central lobular stroma.  
14 The surrounding stroma includes the subpleural interlobular septum and the intralobular  
15 interstitium<sup>28,32</sup>.

16 We divided the lesions into two categories according to the CT values: i. Ground glass opacity  
17 (GGO). In this type of lesion, local lung tissue has slightly increased density, but bronchial and  
18 blood vessels can still be clearly displayed; ii. consolidation. In this type of lesion, local lung  
19 tissue has increased density, and bronchial and vascular are unclear. In addition to the focal  
20 patches and mass signs, the highlights of fibrous bands, mesh signs, and subpleural linear bands  
21 are included in the consolidation range. The radiologic findings were evaluated by thresholding  
22 on CT values<sup>16</sup>. GGO and consolidation regions were determined by ranges of -700~-200  
23 Hounsfield units (HU) and -200~60 HU, respectively. Furthermore, when GGO intertwined  
24 with consolidation, the two were separated according to the sudden change in voxel's CT level.  
25 The large area with low CT intensity was classified as GGO, while the other with relatively  
26 high CT values was classified as consolidation. In general, the lesion area varies in texture, size  
27 and location; The boundary of GGO generally has low gray contrast and blurred appearance.  
28 The consolidation area is relatively small, scattered and irregular. Automatic segmentation of  
29 these lesions is a challenging task. According to several published studies on segmentation of  
30 COVID-19 lesions, the segmentation accuracies are as follows: Ground-Glass Opacity has a  
31 DSC less than 65%, and Consolidation has a DSC less than 46%<sup>33-35</sup>. In the proposed forecast  
32 model, GGO has a DSC of 61.3%, and Consolidation has a DSC of 42.8%. Compared with the  
33 performance of lesion segmentation (which is a much easier task), the performance of our  
34 proposed forecast model is reasonable.

35 In this study, some cases showed a co-occurrence of progression and organized repair of local  
36 lesions, that is, partial lesions improvement accompanied by some lesions aggravation or  
37 breeding of new lesions. In these cases of recurrent growth and evolution of multiple lesions,  
38 the proposed model can also achieve robust performance. After the comparative analysis of  
39 multi-stage images of the patients, we learned that the new lesions would replicate the growth  
40 process of earlier lesions, but only a delayed inflammatory response in some lung areas, rather  
41 than the aggravation or re-infection, as shown in **Figure 2, 4a** and **Lesion development of the**  
42 **patients with COVID-19.mov** in supplementary materials. Therefore, if a few lesions in the  
43 previous stages show a trend of improvement or deterioration, lesions in the subsequent stages  
44 will also develop in a step-by-step manner. Due to this development pattern, our proposed  
45 model is able to excavate the correlation between multiple lesions and various driving factors.

46 Our proposed model was tested in various subsets and acceptable results were obtained. As  
47 shown in **Table 1b**, Kappa coefficient is greater than 0.60 in most of the 6 subsets, with a



1 satisfactory agreement. The FoM values in different subsets have significant heterogeneity.  
2 Patients with advanced age, underlying diseases, obesity, and severe illness tend to have lower  
3 FoM values. This is due to the rapid and complex development of lung lesions in these patients,  
4 which potentially reflects some of their individual physiological functions. For instance,  
5 patients with severe obesity ( $BMI \geq 35$ ) may suffer from dyspnea due to the fat under the  
6 diaphragm. Fat produces a considerable amount of pro-inflammatory molecules called  
7 cytokines, i.e., an immune battle in the human body producing low-level background  
8 inflammation<sup>36</sup>, which is another important risk factor. The development of lesions is an  
9 organic and adaptive mechanism that affected by the characteristics of individuals. The changes  
10 of lesions are not only related to spatial variables, but also related to patients' basic clinical  
11 characteristics (age, gender, Body Mass Index), whether there is underlying disease, treatment  
12 methods, and dynamic changes in laboratory test indicators. These factors have great  
13 complexity and randomness. Therefore, the proposed RF+CA model still cannot fully consider  
14 the actual situation despite its superior performance over other models.

15 In conclusion, voxel-level forecast model for the development of lesions is of great significance  
16 for personalized treatment of COVID-19 patients and the matching and coordination of limited  
17 medical resources in the future. We made a preliminary exploration to this challenging topic.  
18 Due to the limited patient data and the large interval between multi-stage CT examinations, the  
19 predictive ability of the proposed system still has room for improvement. We believe that the  
20 performance will improve if more cases are collected and analyzed. In addition, the prediction  
21 method can also be extended to the prediction of lesions development for other diseases, such  
22 as acute stroke.

## 1 **Methods**

### 2 **Data Collection**

3 We collected CT volumes from three different centers in Wuhan, which are Wuhan Union  
4 Hospital, Western Campus of Wuhan Union Hospital, and Jiangnan Mobile Cabin Hospital.  
5 1337 standard 3D CT volumes of 417 subjects diagnosed as COVID-19 were selected. All CT  
6 scans were performed with patients in supine position, using one of the following scanners:  
7 SOMATOM Perspective, SOMATOM Spirit, or SOMATOM Definition AS+ (Siemens®  
8 Healthineers, Forchheim, Germany). Scanning was performed from the level of the upper chest  
9 entrance to the lower angle of the costal diaphragm, using the following parameters: detector  
10 collimation width  $64 \times 0.6$  mm,  $128 \times 0.6$  mm,  $64 \times 0.6$  mm,  $64 \times 0.6$  mm; tube voltage  
11 120 kv. The tube current was adjusted by the automatic exposure control system (Care dose  
12 4D; Siemens Healthineers). The slice thicknesses of the reconstructed image were 1.5 mm and  
13 1 mm, and the interval were 1.5 mm and 1 mm. In all cases, the upper limit of the interval  
14 between adjacent CT scans was 15 days, the average value was approximately 7 days. To utilize  
15 all data efficiently, all cases with more than 3 stages were split into sub-groups with 3  
16 consecutive stages using sliding window method. Finally, 503 sub-groups are collected as the  
17 experimental dataset in this study.

### 18 **Image annotation**

19 Three types of masks are required considering the characteristic of lesion development,  
20 including the whole lung region, various TAI and lesions caused by COVID-19. For simplicity,  
21 two categories of lung masks and two categories of lesions were determined, while the different  
22 TAI categories were regarded as the same class. Specifically, lung masks were divided into left  
23 and right lobes, while the lesions caused by COVID-19 were distinguished as GGO and  
24 consolidation, respectively.

25 For lung and lesion mask, annotation procedure was applied in an automatic way: a vanilla 3D  
26 U-Net (**Figure S1a**, see supplementary methods for details) based on 60 manually annotated  
27 scans was trained to generate segmentation masks. Since lung segmentation was easy and  
28 achieved acceptable performance, there was no further modification performed. Due to the  
29 complicated background and various appearance of lesion, a refinement was performed after  
30 automatic segmentation by two well-trained experts (the two board-certified radiologists have  
31 12 and 21 years of experience, respectively) using a self-developed multi-stage simultaneous  
32 segmentation toolbox ([https://github.com/weixr18/OCD\\_Slicer\\_Plugin/tree/release-  
amd64/OpenCOVID\\_Detector/CT\\_Annotate](https://github.com/weixr18/OCD_Slicer_Plugin/tree/release-amd64/OpenCOVID_Detector/CT_Annotate)) based on 3D Slicer (<https://www.slicer.org/>).  
33 After their separate annotation, any differences were resolved through discussion and  
34 consensus. For TAI mask, a 2.5D segmentation framework, containing three vanilla 2D U-Nets  
35 (**Figure S1 b**, see supplementary methods for details), was designed to separate the tubular  
36 structure from complicated background, and trained on 49 scans that were manually annotated  
37 using Mimics (Materialise, Leuven, Belgium).  
38

### 39 **Data pre-processing**

40 The HU value of CT volumes ranges from -2048 to 3071. For a clear view of lungs and tissues  
41 inside lungs, we truncated a window of [-1200,700], and normalized the value to float value as  
42 standard normal distribution.

1 Firstly, a lung segmentation network, i.e. vanilla 3D U-Net (The network structure is shown in  
2 **Figure S1a** in Supplementary methods), was trained on a dataset containing 60 chest CT scans.  
3 Then all volumes in our dataset were processed to generate the masks of left and right lung  
4 with five lobes. Similarly, lesion and TAI mask were generated using the abovementioned  
5 segmentation framework, and leaks outside the lung region were removed. The segmented TAI  
6 masks are shown in **Figure 2, 3** in **Result** section.

7 Then a cropping operation was performed to exclude complicated background. Note that the  
8 lung segmentation results were split into left and right lung lobe groups, and thus all volumes  
9 were cropped to contain the left or right lung lobe only.

10 Since our proposed algorithm takes 2D images as input, all volumes are supposed to be sliced.  
11 Registration, consequently, is needed before doing such slicing operation, to keep consistence  
12 at voxel level between different stages. Specifically, a registration was applied to align the  
13 volumes for the same patient<sup>37</sup> to the same coordinate system (extracted from the first stage of  
14 CT). Considering the characteristics of lung region and the fact that only the regions inside  
15 lungs were what we concern, we utilized an affine transformation first to initialize the  
16 alignment, followed by a B-spline transformation to refine<sup>38</sup>, based on the extracted lobe masks.  
17 All other segmentation masks extracted from the same CT volume were then transformed to  
18 the same coordinate based on the estimated transformation parameters. All these parameter  
19 estimation and transformation procedure were achieved using *SimpleElastix* in Python<sup>39</sup>.

20 Based on the cropped and aligned 3D volumes, some driving factors, used in our RF+CA  
21 method later, were generated automatically. Driving factors are defined based on the  
22 distribution and pathology of abnormal regions, e.g., expanding through the tubular-system  
23 such as vessels and airways, spreading below the subpleural. The driving factors consist of 6  
24 categories, including original image intensity, lobe mask, TAI mask, distance map of each pixel  
25 to the margin of lobe mask, distance map to the center of lesion region, and distance map to  
26 the centerline of various TAI.

27 Note that due to different lesion categories sharing similar characteristics, the distance map to  
28 the center of lesion mask was calculated based on the whole lesion regions yet ignoring the  
29 specific types. To extract the distance map of TAI, the centerlines were extracted first using  
30 the morphological thinning algorithm, and followed by the Euclidean distance transformation  
31 algorithm from *Scipy* in Python<sup>40</sup>. The other two distance maps were generated similarly.

32 Finally, all these volumes were sliced. Slices in later stages were ignored for brevity, if the  
33 corresponding first stage contained no obvious lesions, unless the slices had considerable  
34 disease (the lesion region larger than 30 pixels). Different stages from the same patient were  
35 grouped for further analysis. Consequently, 35018 groups of multi-stage sequential images and  
36 their corresponding lesion masks along with driving factors were selected for further analysis.  
37 Note that each group contained 3 stages only.

## 38 **Estimate suitability using random forest algorithm**

39 Development suitability, namely the potential changing energy of each lesion categories, was  
40 estimated by applying random forest (RF) algorithm<sup>41</sup> on slices of original images and  
41 corresponding driving factors from current stage.

42 The RF model took each pixel along with its  $15 \times 15$  surrounding neighbors from current stage  
43 as input. It was then supervised by the annotated lesion category of center pixel from the next

1 stage. The first two stages were used for training and the last stage was used for estimation and  
2 evaluation. Due to the class imbalance, which means background region dominated the image,  
3 balanced-subsampling and bootstrapping were utilized to explore the hard samples, and 100  
4 independent decision trees were used to increase estimation accuracy and generalization ability.  
5 Based on the estimated development suitability, the development probability for next stage was  
6 calculated, which was utilized in cellular automata (CA) simulation later.

7 The most important step in this algorithm is to optimize different model parameters using the  
8 first two stages for different time, patients, and even lobes (i.e., left and right lung). It is  
9 intuitive that different model parameters need to be estimated since the development of disease  
10 in different patients varies. Besides, the relation of disease development between left and right  
11 lung lobe is not obvious in most cases, e.g., the lesion region is growing in left lung lobe, while  
12 the size is reducing in another lung lobe (in fact, considering the presence of fissure, the disease  
13 development progression varies in five lobes). Furthermore, the lesion progression speed and  
14 tendency would not be identical within the same lung lobe. Therefore, the RF model was  
15 finetuned when there were new stages incorporated as training samples to estimate lesion  
16 regions at later stages.

## 17 Evaluation metric

18 To evaluate the performance of the aforementioned algorithm, we considered the classic  
19 metrics used in object segmentation and land use and cover change (LUCC) task, respectively.  
20 DSC<sup>42</sup> is widely used in object segmentation task to evaluate the similarity between prediction  
21 and annotation mask:

$$22 \quad DSC = \frac{2|A \cap B|}{|A| + |B|} \quad (5)$$

23 Here  $A$  and  $B$  represent the set of ground-truth and the prediction, respectively.  $|\cdot|$  denotes the  
24 number of pixels associated with the certain class label, e.g. the number of pixels predicted or  
25 annotated as GGO. When the prediction is similar to annotation in pixel level, the metric DSC  
26 is close to 1, otherwise 0.

27 In LUCC tasks, Kappa coefficient and FoM are mostly adopted to verify model accuracy<sup>43,44</sup>.  
28 Kappa coefficient is a statistical measure of the reliability or consistency of internal raters, and  
29 defined as follows:

$$30 \quad Kappa = \frac{p_o - p_c}{1 - p_c}, p_o = \frac{\sum_{k=1}^K TP_k}{N}, p_c = \frac{\sum_{k=1}^K T_k P_k}{N^2} \quad (6)$$

31 Here,  $K$  and  $N$  represent the number of classes and the total number of samples, respectively.  
32  $TP_k$ ,  $T_k$  and  $P_k$  represent the number of pixels correctly predicted as class  $k$  (correct  
33 prediction), the number of pixels annotated as class  $k$  (ground-truth) and the number of pixels  
34 predicted as class  $k$  (prediction), respectively. In other words,  $p_o$  represents the total observed  
35 accuracy and  $p_c$  represents the chance agreement. The strength interpretation of Kappa  
36 coefficient is: slight [0.01-0.20]; fair [0.21-0.40]; moderate [0.41-0.60]; substantial [0.61-0.80];  
37 nearly perfect [0.81-1.00].

38 FoM is a quantity used to measure the prediction performance. The formula is defined as  
39 follows:

$$40 \quad FOM = \frac{B}{A+B+C+D} \quad (7)$$

1 where  $A$  is the error zone caused by the prediction of observed change as persistence;  $B$  is the  
2 correct zone caused by the prediction of observed change as change;  $C$  is the error zone caused  
3 by the prediction of observed change as wrong gaining category;  $D$  is the error zone caused by  
4 the prediction of observed persistence as change.

5 Additionally, to evaluate the location accuracy of predicted area, we proposed a metric named  
6 positional accuracy (PA) to measure the offset between predicted lesion region and ground-  
7 truth, in pixel level, which is defined as followed,

$$8 \quad PA = \|C_p - C_g\|_2 \quad (8)$$

9 where  $C_p$  and  $C_g$  are the equivalent mass center of prediction and annotation mask, respectively.

## 10 Cellular automata simulation

11 In addition to the development suitability, the lesion development is influenced by other factors,  
12 such as neighborhood effects, constraint restriction, and stochastic randomness.

13 Neighborhood effects  $\Omega$  play a vital role in CA algorithm. In the CA model, there are local  
14 interactions between cells, and the state (diseased or not) of a cell at the next moment is  
15 determined by its neighbors. e.g., a normal cell has an extremely high probability to change to  
16 GGO in the next stage, when the surrounding cells are simulated as GGO at current stage. The  
17 most frequently employed neighborhood models are von Neumann, Moore and extended  
18 square neighborhood. To avoid disparate effects, we used Moore neighborhood<sup>45</sup> in this study.

19 Constraint factor  $P_c$  is a limitation to prevent lesions from presenting outside lung mask. The  
20 undevelopable area is determined in advance, i.e. the cells outside of lung region are restricted  
21 from lesion development.

22 Stochastic factor  $P_r$ , intuitively, is introduced to increase randomness and thus generalization  
23 ability. The evolution of lesions is not only affected by various deterministic factors including  
24 the development suitability, but also random factors such as whether the patient suffers from  
25 basic diseases, psychological state, treatment mode etc.

26 Considering the above four parts, the probability that a single cell will be transformed at time  
27  $t + 1$  is defined as:

$$28 \quad P_{i,k}^{t+1} = P_{d_{i,k}}^{t+1} * \Omega_{i,k}^{t+1} * P_{c_i}^{t+1} * P_r \quad (4)$$

29 Here  $P_{i,k}^{t+1}$  is the probability that cell  $i$  converts to class  $k$  at time  $t + 1$ .  $P_{d_{i,k}}^{t+1}$  is the  
30 development suitability of cell  $i$  belonging to class  $k$  at time  $t + 1$ . Therefore,  $P_{i,k}^{t+1}$  was fed  
31 into CA model to simulate development of infectious area.

32 Combing the calculated development suitability, neighborhood effects, constraint factors and  
33 stochastic factors, the probability of transformation for every single cell, i.e. pixel, was  
34 determined. Then the simulation using CA algorithm<sup>46 47</sup> was applied by setting the simulation  
35 steps to half of the time interval between the current and next stage.

36 In summary, the RF+CA algorithm is divided into following steps: (1) Construct a set of data  
37 (driving factors) related to the development of infectious area. (2) The RF model is trained,  
38 using original images and driving factors from the first stage, to predict lesion potential  
39 (development suitability in CA algorithm) for the second stage. (3) The estimated RF model is

1 utilized to predict development suitability for the third stage based on the existing image and  
2 driving factors from the second stage. (4) The development suitability, neighborhood effects,  
3 constraint factors and stochastic factors are combined to simulate the lesion development using  
4 CA algorithm. (5) Considering the time interval and disease evolution speed based on the  
5 previous data, the final probability of whether some regions of lungs will develop into lesion  
6 or not in the future is predicted. The workflow of RF+CA model is shown in **Figure 1**.

## 7 **Model to model comparison**

### 8 **Deep leaning with normal distribution prior**

9 During the manual annotation of lesion mask, we noted that the development of most lesions  
10 followed a gaussian-like distribution<sup>48,49</sup> of time  $T$  (See **Figure S2** and Supplementary methods  
11 for details). Therefore, it is a reliable hypothesis that the lesion caused by COVID-19 follows  
12 the same distribution family with different parameters in different areas (The growth pattern of  
13 multiple lesions in the same patient is consistent. See the Discussion section of the main text  
14 for details).

15 Therefore, a 3D CNN was trained to estimate the distribution parameters for each pixel given  
16 original image slices from more than two stages. To introduce the time relevant information,  
17 *Gated Recurrent Unit* (GRU)<sup>50</sup>, a variant of convolutional Long Short-Term Memory (conv-  
18 LSTM), was utilized to enhance time interval related information flow. The outputs of decoder  
19 were parameters of the predetermined gaussian distribution,  $\mu$  and  $\sigma^2$ . For stability, the  
20 expectation  $\mu$  was set as the offset from current position to the peak, and  $\log\sigma^2$  was estimated  
21 instead. In addition, considering the complicated mechanism of lesion development, we used  
22 sigmoid function, an extra asymmetric function, to control the development speed before and  
23 after the peak moment. Consequently, the lesion at any moment, theoretically, could be  
24 predicted given these distribution parameters estimated approximately. However, limited by  
25 the data used for estimation, the precision and consistency decreased with increasing time  
26 interval. The workflow is also shown in **Figure S2** of Supplementary methods.

### 27 **Deep learning-based CA**

28 We used the deep learning model described in the previous section to generate development  
29 suitability. Different from RF model, which was trained only on one group of slices at each  
30 stage, this model was trained on a subset of extracted slices. Similarly, the output was regarded  
31 as development suitability  $P_d$  used in CA algorithm. It was combined with neighborhood  
32 effects  $\Omega$ , constraint factor  $P_c$  and stochastic factor  $P_r$  to determine the transformation  
33 probability for each pixel. The overall workflow is shown in **Figure S3** of Supplementary  
34 methods.

## Reference

- 1 Jebril, N. World Health Organization declared a pandemic public health menace: A systematic review of the coronavirus disease 2019 “COVID-19”, up to 26th March 2020. *Available at SSRN 3566298* (2020).
- 2 Bi, Q. *et al.* Epidemiology and transmission of COVID-19 in 391 cases and 1286 of their close contacts in Shenzhen, China: a retrospective cohort study. *The Lancet Infectious Diseases* (2020).
- 3 Chen, N. *et al.* Epidemiological and clinical characteristics of 99 cases of 2019 novel coronavirus pneumonia in Wuhan, China: a descriptive study. *The Lancet* **395**, 507-513 (2020).
- 4 Yang, X. *et al.* Clinical course and outcomes of critically ill patients with SARS-CoV-2 pneumonia in Wuhan, China: a single-centered, retrospective, observational study. *The Lancet Respiratory Medicine* (2020).
- 5 Wang, Y. *et al.* Neutrophil-to-lymphocyte ratio as a prognostic marker in acute respiratory distress syndrome patients: a retrospective study. *Journal of thoracic disease* **10**, 273 (2018).
- 6 Kumarasamy, C. *et al.* Prognostic significance of blood inflammatory biomarkers NLR, PLR, and LMR in cancer—A protocol for systematic review and meta-analysis. *Medicine* **98** (2019).
- 7 Feng, Z. *et al.* Early prediction of disease progression in COVID-19 pneumonia patients with chest CT and clinical characteristics. *Nature communications* **11**, 1-9 (2020).
- 8 Zhou, F. *et al.* Clinical course and risk factors for mortality of adult inpatients with COVID-19 in Wuhan, China: a retrospective cohort study. *The lancet* (2020).
- 9 Wu, C. *et al.* Risk factors associated with acute respiratory distress syndrome and death in patients with coronavirus disease 2019 pneumonia in Wuhan, China. *JAMA internal medicine* (2020).
- 10 Li, L. *et al.* Using artificial intelligence to detect COVID-19 and community-acquired pneumonia based on pulmonary CT: evaluation of the diagnostic accuracy. *Radiology* **296** (2020).
- 11 Lessmann, N. *et al.* Automated assessment of CO-RADS and chest CT severity scores in patients with suspected COVID-19 using artificial intelligence. *Radiology*, 202439 (2020).
- 12 Harmon, S. A. *et al.* Artificial intelligence for the detection of COVID-19 pneumonia on chest CT using multinational datasets. *Nature communications* **11**, 1-7 (2020).
- 13 Gao, K. *et al.* Dual-branch combination network (DCN): Towards accurate diagnosis and lesion segmentation of COVID-19 using CT images. *Medical image analysis* **67**, 101836 (2020).
- 14 Wang, G. *et al.* A noise-robust framework for automatic segmentation of covid-19 pneumonia lesions from ct images. *IEEE Transactions on Medical Imaging* **39**, 2653-2663 (2020).
- 15 Pan, F. *et al.* Time course of lung changes on chest CT during recovery from 2019 novel coronavirus (COVID-19) pneumonia. *Radiology*, 200370 (2020).
- 16 Liu, F. *et al.* CT quantification of pneumonia lesions in early days predicts progression to severe illness in a cohort of COVID-19 patients. *Theranostics* **10**, 5613 (2020).
- 17 Cao, Y. *et al.* Longitudinal assessment of covid-19 using a deep learning–based quantitative ct pipeline: Illustration of two cases. *Radiology: Cardiothoracic Imaging* **2**, e200082 (2020).
- 18 Jin, C. *et al.* Development and evaluation of an artificial intelligence system for COVID-19 diagnosis. *Nature communications* **11**, 1-14 (2020).
- 19 Bai, X. *et al.* Predicting COVID-19 malignant progression with AI techniques. *Preprints with The Lancet* (2020).
- 20 Liang, W. *et al.* Development and validation of a clinical risk score to predict the occurrence of critical illness in hospitalized patients with COVID-19. *JAMA Internal Medicine* (2020).
- 21 Kim, H. Outbreak of novel coronavirus (COVID-19): What is the role of radiologists? *European Radiology* **30**, 3266-3267 (2020).
- 22 J, N. H. C. J. C. M. Diagnosis and treatment protocol for novel coronavirus pneumonia (Trial Version 7). *Chin Med J (Engl)* **133**, 1087-1095 (2020).

- 23 *Rapid health declines in COVID-19 patients jar doctors, nurses,*  
<<https://www.reuters.com/article/us-health-coronavirus-usa-deaths/from-fine-to-flailing-rapid-health-declines-in-covid-19-patients-jar-doctors-nurses-idUSKCN21Q36V>> (2020).
- 24 *Why Some COVID-19 Cases Are Worse than Others,* <<https://www.the-scientist.com/news-opinion/why-some-covid-19-cases-are-worse-than-others-67160>> (2020).
- 25 Kambouchner, M., Bernaudin, J.-F. J. J. o. H. & Cytochemistry. Intralobular pulmonary lymphatic distribution in normal human lung using D2-40 antipodoplanin immunostaining. *Journal of Histochemistry & Cytochemistry* **57**, 643-648 (2009).
- 26 Schraufnagel, D. E. J. P. Lung lymphatic anatomy and correlates. *Pathophysiology* **17**, 337-343 (2010).
- 27 Zhou, S., Zhu, T., Wang, Y. & Xia, L. J. E. R. Imaging features and evolution on CT in 100 COVID-19 pneumonia patients in Wuhan, China. *European Radiology*, 1-9 (2020).
- 28 Sozio, F. *et al.* Morphometric analysis of intralobular, interlobular and pleural lymphatics in normal human lung. *Journal of anatomy* **220**, 396-404 (2012).
- 29 Shi, H. *et al.* Radiological findings from 81 patients with COVID-19 pneumonia in Wuhan, China: a descriptive study. *The Lancet Infectious Diseases* (2020).
- 30 Scaglione, M., Linsenmaier, U., Schueller, G., Berger, F. & Wirth, S. *Emergency Radiology of the Chest and Cardiovascular System*. (Springer, 2016).
- 31 Oikonomou, A. & Prassopoulos, P. Mimics in chest disease: interstitial opacities. *Insights into Imaging* **4**, 9-27 (2013).
- 32 Verschakelen, J. A. & De Wever, W. *Computed tomography of the lung*. (Springer, 2007).
- 33 Fan, D.-P. *et al.* Inf-Net: Automatic COVID-19 Lung Infection Segmentation from CT Images. *IEEE Transactions on Medical Imaging* (2020).
- 34 Shi, F. *et al.* Review of artificial intelligence techniques in imaging data acquisition, segmentation and diagnosis for covid-19. *IEEE reviews in biomedical engineering* (2020).
- 35 *COVID-19 CT segmentation dataset*, <<https://medicalsegmentation.com/covid19/>> (2020).
- 36 Kass, D. A., Duggal, P. & Cingolani, O. Obesity could shift severe COVID-19 disease to younger ages. *Lancet* (2020).
- 37 Oliveira, F. P. & Tavares, J. M. R. Medical image registration: a review. *Computer methods in biomechanics and biomedical engineering* **17**, 73-93 (2014).
- 38 Klein, S., Staring, M., Murphy, K., Viergever, M. A. & Pluim, J. P. Elastix: a toolbox for intensity-based medical image registration. *IEEE transactions on medical imaging* **29**, 196-205 (2009).
- 39 Marstal, K., Berendsen, F., Staring, M. & Klein, S. SimpleElastix: A user-friendly, multi-lingual library for medical image registration. In *Proceedings of the IEEE conference on computer vision and pattern recognition workshops*. 134-142.
- 40 Virtanen, P. *et al.* SciPy 1.0: fundamental algorithms for scientific computing in Python. *Nature methods* **17**, 261-272 (2020).
- 41 Liaw, A. & Wiener, M. Classification and regression by randomForest. *R news* **2**, 18-22 (2002).
- 42 Shamir, R. R., Duchin, Y., Kim, J., Sapiro, G. & Harel, N. Continuous dice coefficient: a method for evaluating probabilistic segmentations. *arXiv preprint arXiv:1906.11031* (2019).
- 43 Xia, C., Zhang, A., Wang, H. & Zhang, B. Modeling urban growth in a metropolitan area based on bidirectional flows, an improved gravitational field model, and partitioned cellular automata. *International Journal of Geographical Information Science* **33**, 877-899 (2019).
- 44 Yang, C. *et al.* Simulating and forecasting spatio-temporal characteristic of land-use/cover change with numerical model and remote sensing: a case study in Fuxian Lake Basin, China. *European Journal of Remote Sensing* **52**, 374-384 (2019).
- 45 Singh, D. & Kumar, V. Image dehazing using Moore neighborhood-based gradient profile prior. *Signal Processing: Image Communication* **70**, 131-144 (2019).
- 46 Mallet, D. G. & De Pillis, L. G. A cellular automata model of tumor-immune system interactions. *Journal of theoretical biology* **239**, 334-350 (2006).
- 47 Codd, E. F. *Cellular automata*. (Academic Press, 2014).



- 48 Megalooikonomou, V., Davatzikos, C. & Herskovits, E. H. A simulator for evaluating methods for the detection of lesion-deficit associations. *Human Brain Mapping* **10**, 61-73 (2000).
- 49 Jun, H. J., Park, J. K. & Bae, C. H. Deep Learning Neural Networks for Determining Replacement Timing of Steel Water Transmission Pipes. In *2017 International Conference on Control, Artificial Intelligence, Robotics & Optimization (ICCAIRO)*. 219-225 (IEEE).
- 50 Dey, R. & Salemt, F. M. Gate-variants of gated recurrent unit (GRU) neural networks. In *2017 IEEE 60th international midwest symposium on circuits and systems (MWSCAS)*. 1597-1600 (IEEE).

**Table 1** The performance of the forecast system. **a.** Performance comparison of three models: RF+CA, DNN, DNN+CA. **b.** The performance of the RF+CA model in six subsets.

**a.**

| Methods    | Cohort                  | DSC (% , std) |             |               | Kappa (std)   | FoM (std)     | PA (pixel, std) |
|------------|-------------------------|---------------|-------------|---------------|---------------|---------------|-----------------|
|            |                         | Whole         | GGO         | Consolidation | Whole         |               |                 |
| RF+CA      | Cohort 1                | 71.4 (15.2)   | 62.1 (18.9) | 36.8 (26.8)   | 0.620 (0.149) | 0.248 (0.122) | 3.37 (2.40)     |
|            | Cohort 2                | 72.3 (12.2)   | 59.7 (14.1) | 31.3 (16.6)   | 0.607 (0.107) | 0.264 (0.073) | 5.60 (2.94)     |
|            | Cohort 3                | 68.9 (18.0)   | 59.1 (20.1) | 44.1 (31.7)   | 0.595 (0.170) | 0.259 (0.109) | 2.21 (1.27)     |
|            | All (Cohort 1, 2 and 3) | 71.1 (15.1)   | 61.3 (18.1) | 42.8 (25.5)   | 0.612 (0.143) | 0.257 (0.109) | 3.63 (2.49)     |
| RNN-NDP    | Cohort 2                | 65.8 (14.4)   | 56.6 (15.4) | 29.6 (19.4)   | 0.571 (0.135) | 0.185 (0.089) | 7.83 (4.25)     |
|            | Cohort 3                | 62.0 (21.5)   | 52.4 (18.8) | 43.7 (36.0)   | 0.537 (0.180) | 0.255 (0.128) | 2.99 (2.74)     |
|            | All (Cohort 2 and 3)    | 65.5 (16.6)   | 56.3 (16.7) | 39.9 (26.4)   | 0.567 (0.153) | 0.249 (0.121) | 5.16 (3.58)     |
| RNN-NDP+CA | Cohort 2                | 69.1 (14.1)   | 57.8 (13.7) | 28.7 (14.5)   | 0.590 (0.124) | 0.168 (0.086) | 6.61 (3.68)     |
|            | Cohort 3                | 70.4 (16.1)   | 58.4 (16.3) | 28.9 (21.4)   | 0.611 (0.141) | 0.232 (0.082) | 2.69 (2.39)     |
|            | All (Cohort 2 and 3)    | 70.2 (14.5)   | 58.0 (15.2) | 28.8 (18.8)   | 0.610 (0.132) | 0.214 (0.092) | 4.35 (2.92)     |

**b.**

| Subset              |                         | DSC (% , std) |             |               | Kappa (std)   | FoM (std)     | PA (pixel, std) |
|---------------------|-------------------------|---------------|-------------|---------------|---------------|---------------|-----------------|
|                     |                         | Whole         | GGO         | Consolidation | Whole         |               |                 |
| Gender              | Male                    | 70.3 (14.8)   | 58.4 (18.7) | 31.2 (18.9)   | 0.611 (0.146) | 0.221 (0.110) | 3.91 (2.66)     |
|                     | Female                  | 72.4 (15.4)   | 57.8 (16.3) | 44.2 (32.4)   | 0.614 (0.120) | 0.222 (0.102) | 3.15 (2.06)     |
| Age                 | ≤ 50                    | 71.0 (15.5)   | 54.2 (19.2) | 37.8 (27.7)   | 0.597 (0.145) | 0.249 (0.100) | 3.25 (2.32)     |
|                     | > 50                    | 70.4 (15.1)   | 60.1 (16.9) | 36.4 (24.8)   | 0.616 (0.144) | 0.202 (0.112) | 3.91 (2.60)     |
| Time                | ≤ 7 days                | 74.8 (10.8)   | 67.4 (10.7) | 36.7 (14.6)   | 0.675 (0.099) | 0.053 (0.057) | 4.29 (2.92)     |
| Interval            | >7 days                 | 70.6 (15.5)   | 56.8 (18.5) | 36.1 (26.5)   | 0.603 (0.146) | 0.242 (0.096) | 3.59 (2.46)     |
| BMI                 | Underweight             | 70.4 (14.2)   | 59.3 (16.1) | 34.2 (22.8)   | 0.613 (0.113) | 0.213 (0.105) | 3.11 (2.62)     |
|                     | Normal and Overweight   | 70.2 (13.7)   | 62.7 (15.8) | 31.2 (14.3)   | 0.626 (0.096) | 0.228 (0.091) | 3.70 (2.05)     |
|                     | Obesity                 | 71.9 (15.1)   | 64.8 (17.3) | 33.6 (19.6)   | 0.617 (0.137) | 0.159 (0.063) | 4.49 (2.78)     |
| Underlying diseases | Underlying diseases     | 72.8 (13.3)   | 65.1 (15.5) | 35.1 (23.2)   | 0.629 (0.131) | 0.189 (0.086) | 4.17 (2.12)     |
|                     | Non-underlying diseases | 69.8 (9.79)   | 64.2 (13.9) | 34.9 (15.3)   | 0.610 (0.116) | 0.228 (0.102) | 3.23 (1.71)     |
| Severe illness      | Severe                  | 73.2 (13.9)   | 65.3 (14.9) | 34.3 (14.1)   | 0.642 (0.137) | 0.178 (0.073) | 4.56 (2.21)     |
|                     | No severe               | 70.1 (10.3)   | 58.7 (11.7) | 31.7 (10.8)   | 0.607 (0.091) | 0.221 (0.071) | 3.18 (1.89)     |

**Note:** RF+CA, Random forest + cellular automata; RNN-NDP, recurrent neural network driven by normal distribution over time; RNN-NDP+CA, recurrent neural network driven by normal distribution over time + cellular automata; GGO, Ground-glass opacity; DSC, Dice Similarity Coefficient; FoM, Figure of Merit index; PA, Positional Accuracy. Std, Standard deviation. Std, standard deviation. Cohort 1 was used as a discovery cohort for RNN-NDP (Training and internal validation).

**Extended data | Table 1 Baseline clinical characteristics of patients in the study.**

| Characteristics |                     | Number (%)              |             |
|-----------------|---------------------|-------------------------|-------------|
| Gender          | Male                | 717 (47.6%)             |             |
|                 | Female              | 788 (52.4%)             |             |
| Age             | ≤ 20                | 4 (0.2%)                |             |
|                 | 21-40               | 255 (16.9%)             |             |
|                 | 41-60               | 532 (35.4%)             |             |
|                 | 61-80               | 649 (43.2%)             |             |
|                 | > 80                | 65 (4.3%)               |             |
| Stage           | 1                   | 636 (42.2%)             |             |
|                 | 2                   | 452 (29.1%)             |             |
|                 | ≥ 3                 | 417 (27.7%)             |             |
| Stage ≥ 3       | Time interval       | ≤7 days                 | 198 (47.5%) |
|                 |                     | > 7 days                | 219 (52.5%) |
|                 | BMI                 | Underweight             | 27 (6.5%)   |
|                 |                     | Normal                  | 162 (38.8%) |
|                 |                     | Overweight              | 57 (13.7%)  |
|                 |                     | Obesity                 | 38 (9.1%)   |
|                 | Underlying diseases | Underlying diseases     | 183 (43.9%) |
|                 |                     | Non-underlying diseases | 101(24.2%)  |
|                 | Severe illness      | Severe                  | 104 (24.9%) |
|                 |                     | Non severe              | 180 (43.2%) |

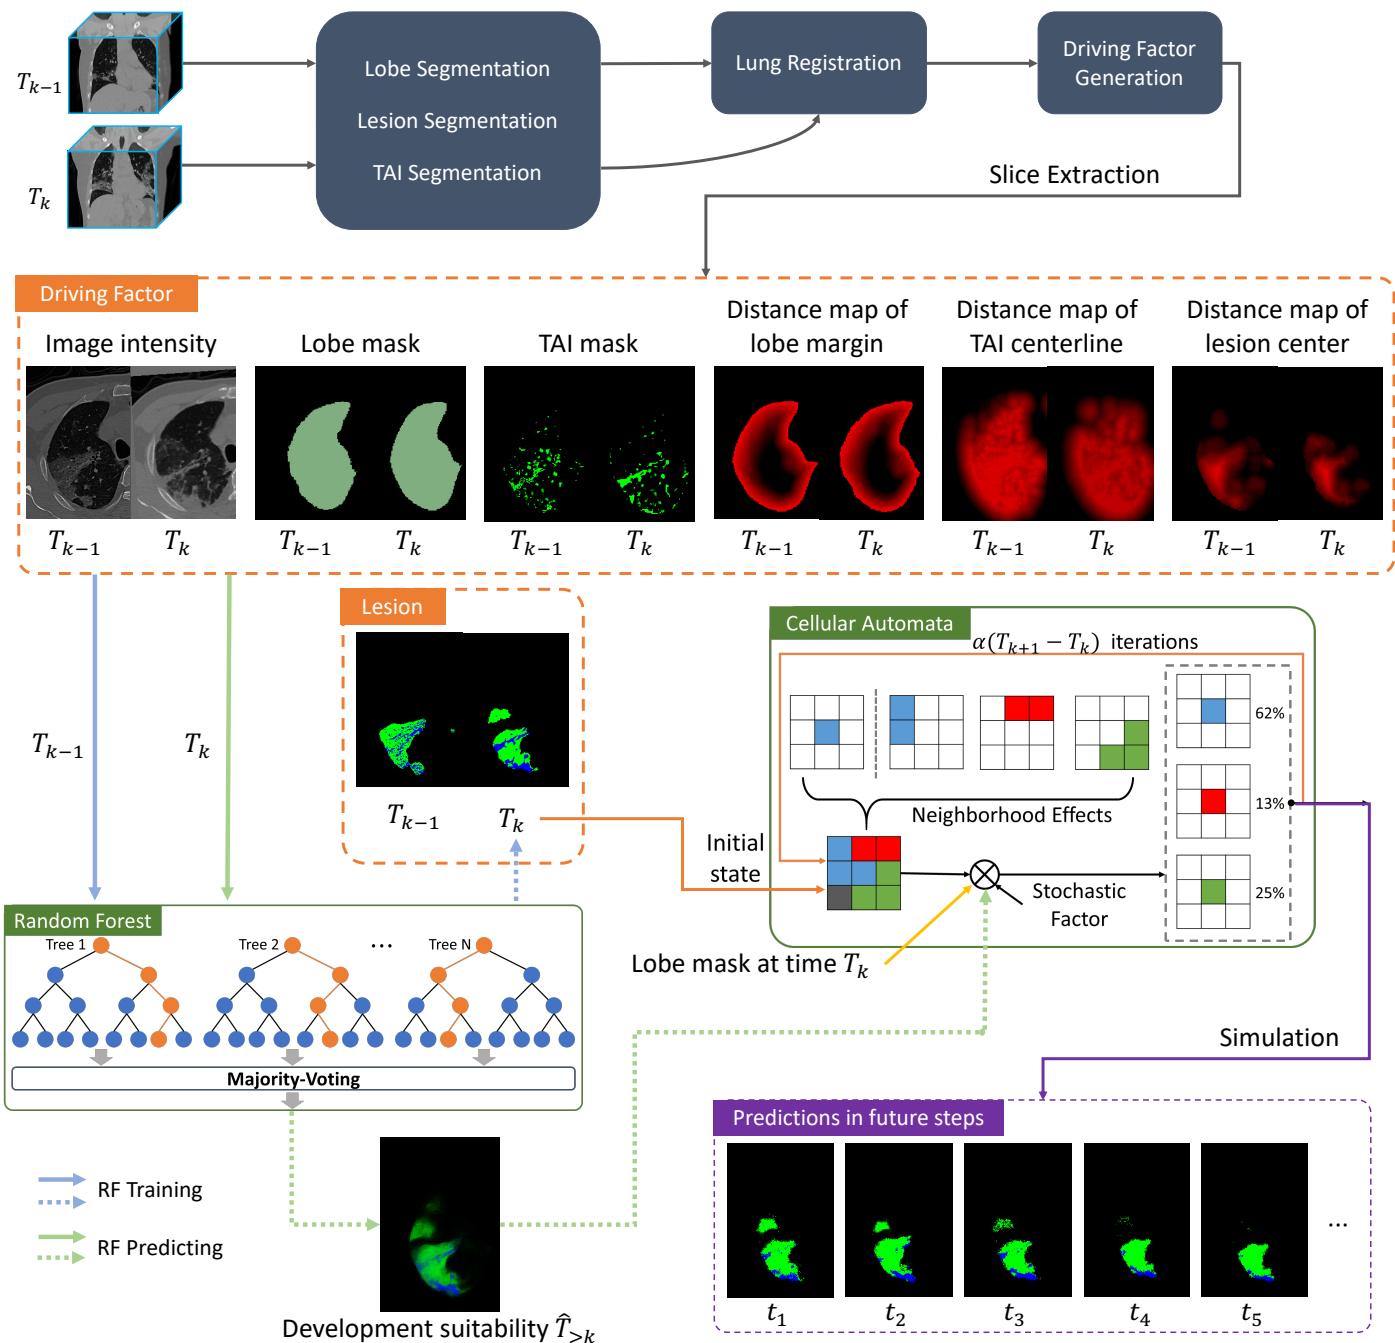

**Figure 1. Lesion evolution forecast by random forest and cellular automata (RF+CA).** TAI: Tubular adjacent interstitials. Lobe: left and right lung lobes. The green pixels in lesion mask and development suitability image denote GGO and blue ones are consolidation. Note that all the driving factors are generated as volumetric data and followed by the slice extraction operation.

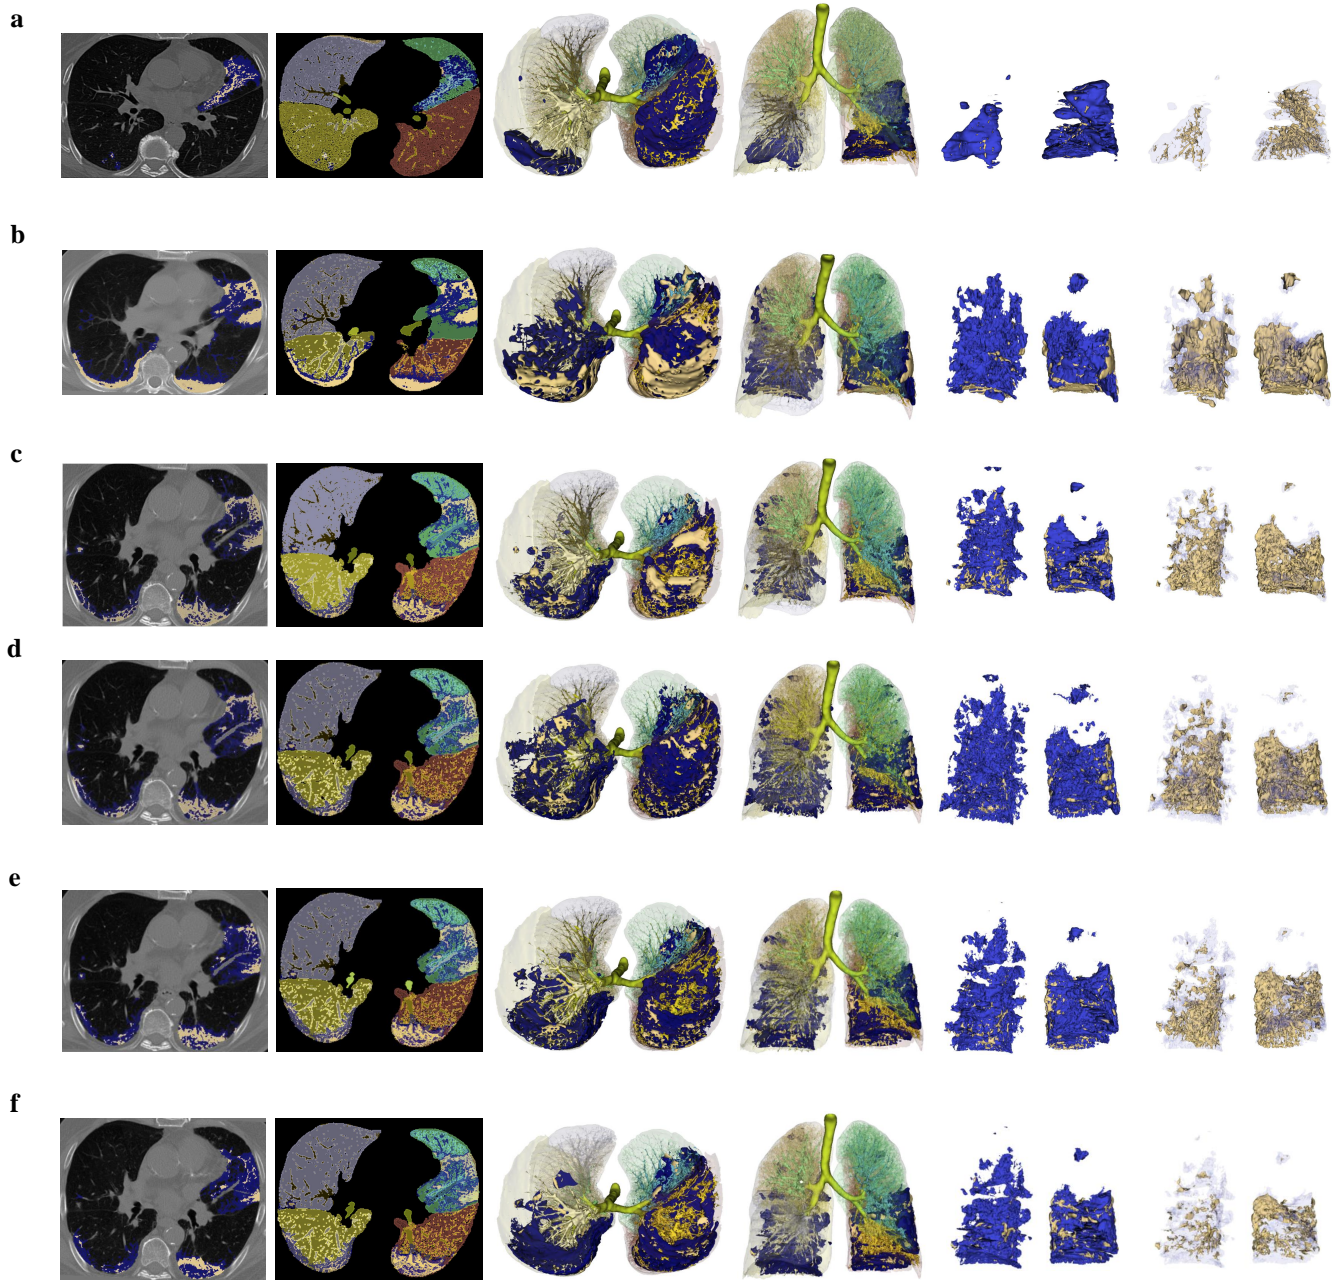

**Figure 2. Simulation results of multi-stage evolution of lesion and non-lesion area based on the RF+CA model from a 57-year-old male patient with hypertension. a** images based on the 1<sup>st</sup> stage CT image of the patient; **b** images based on the 2<sup>nd</sup> stage CT image showing the actual lesion evolution; **c, d** images based on the simulated lesion evolution and the 3<sup>rd</sup> stage of the actual lesion evolution, respectively; **e, f** images based on the predictions of the lesion in the next 5 and 10 days from the 3<sup>rd</sup> stage of CT according to the trend of the disease. **Column 1:** Lesion location on 2D slicing. **Column 2:** Distribution of lesions in the five lung lobes on 2D slicing. **Column 3:** Distribution of lesions with TAI segmentation in 3-D axial view. **Column 4:** Distribution of lesions with TAI segmentation in 3D coronal view. **Column 5:** 3D reconstruction of the whole lesions. **Column 6:** 3D reconstruction of solid lesions. Dark blue area is GGO and light-yellow area is consolidation.

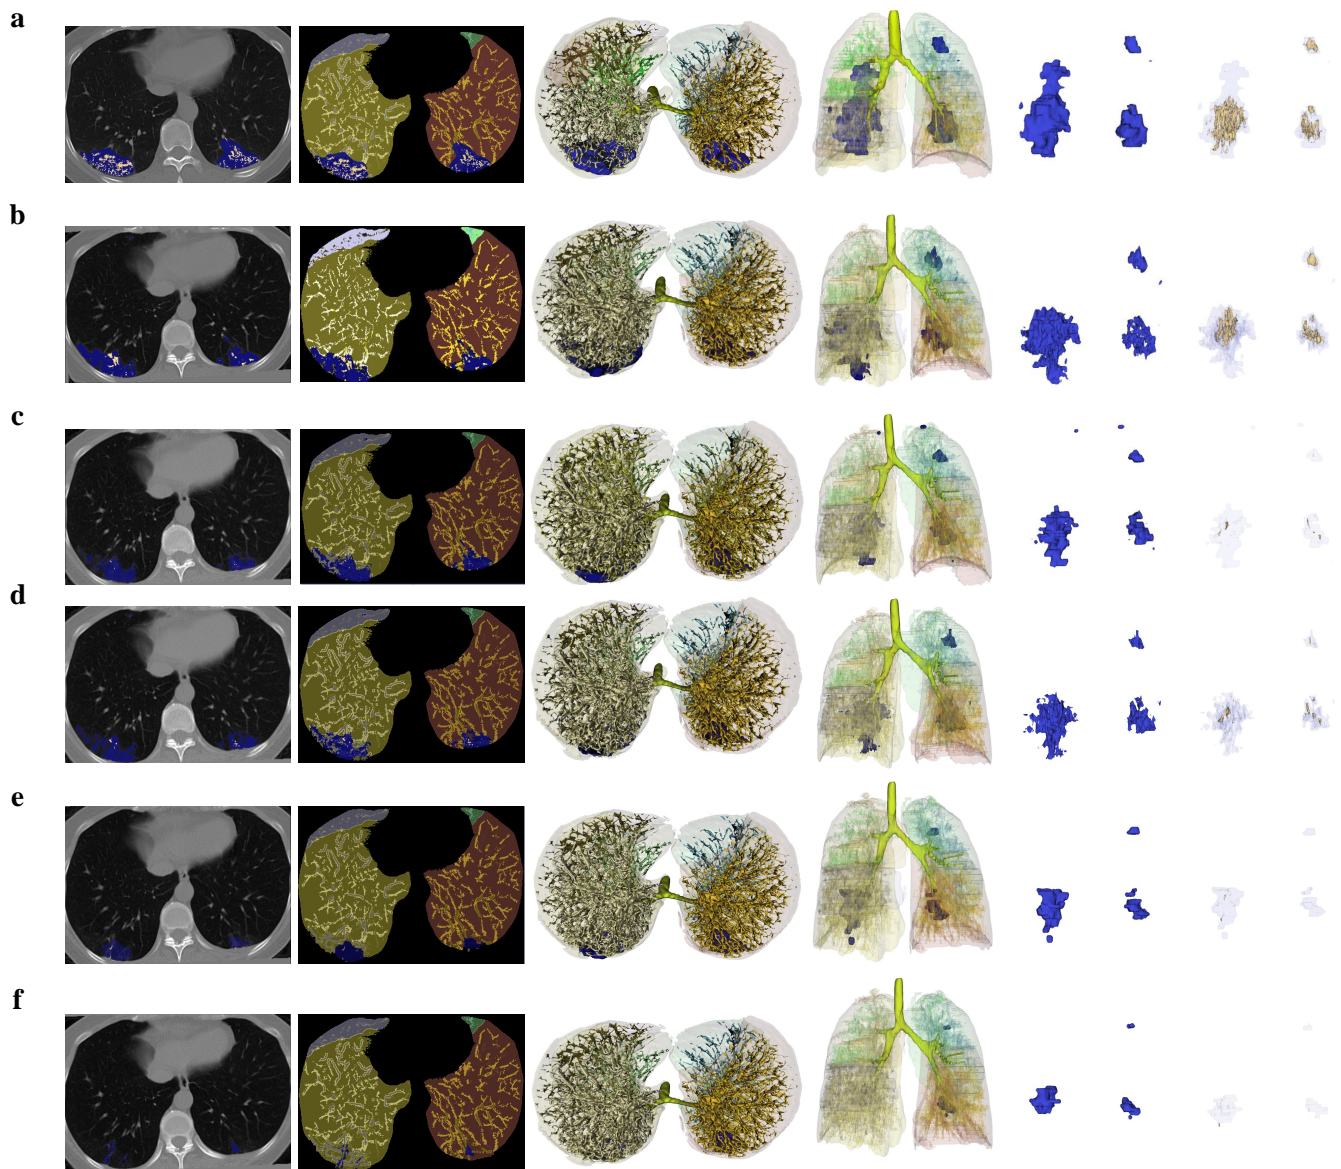

**Figure 3. Simulation results of multi-stage evolution of lesion and non-lesion area based on the RF+CA model from a 36-year-old female patient. a** images based on the 1<sup>st</sup> stage CT image of the patient; **b** images based on the 2<sup>nd</sup> stage CT image showing the actual lesion evolution; **c, d** images based on the simulated lesion evolution and the 3<sup>rd</sup> stage of the actual lesion evolution, respectively; **e, f** images based on the predictions of the lesion in the next 5 and 10 days from the 3<sup>rd</sup> stage of CT according to the trend of the disease.

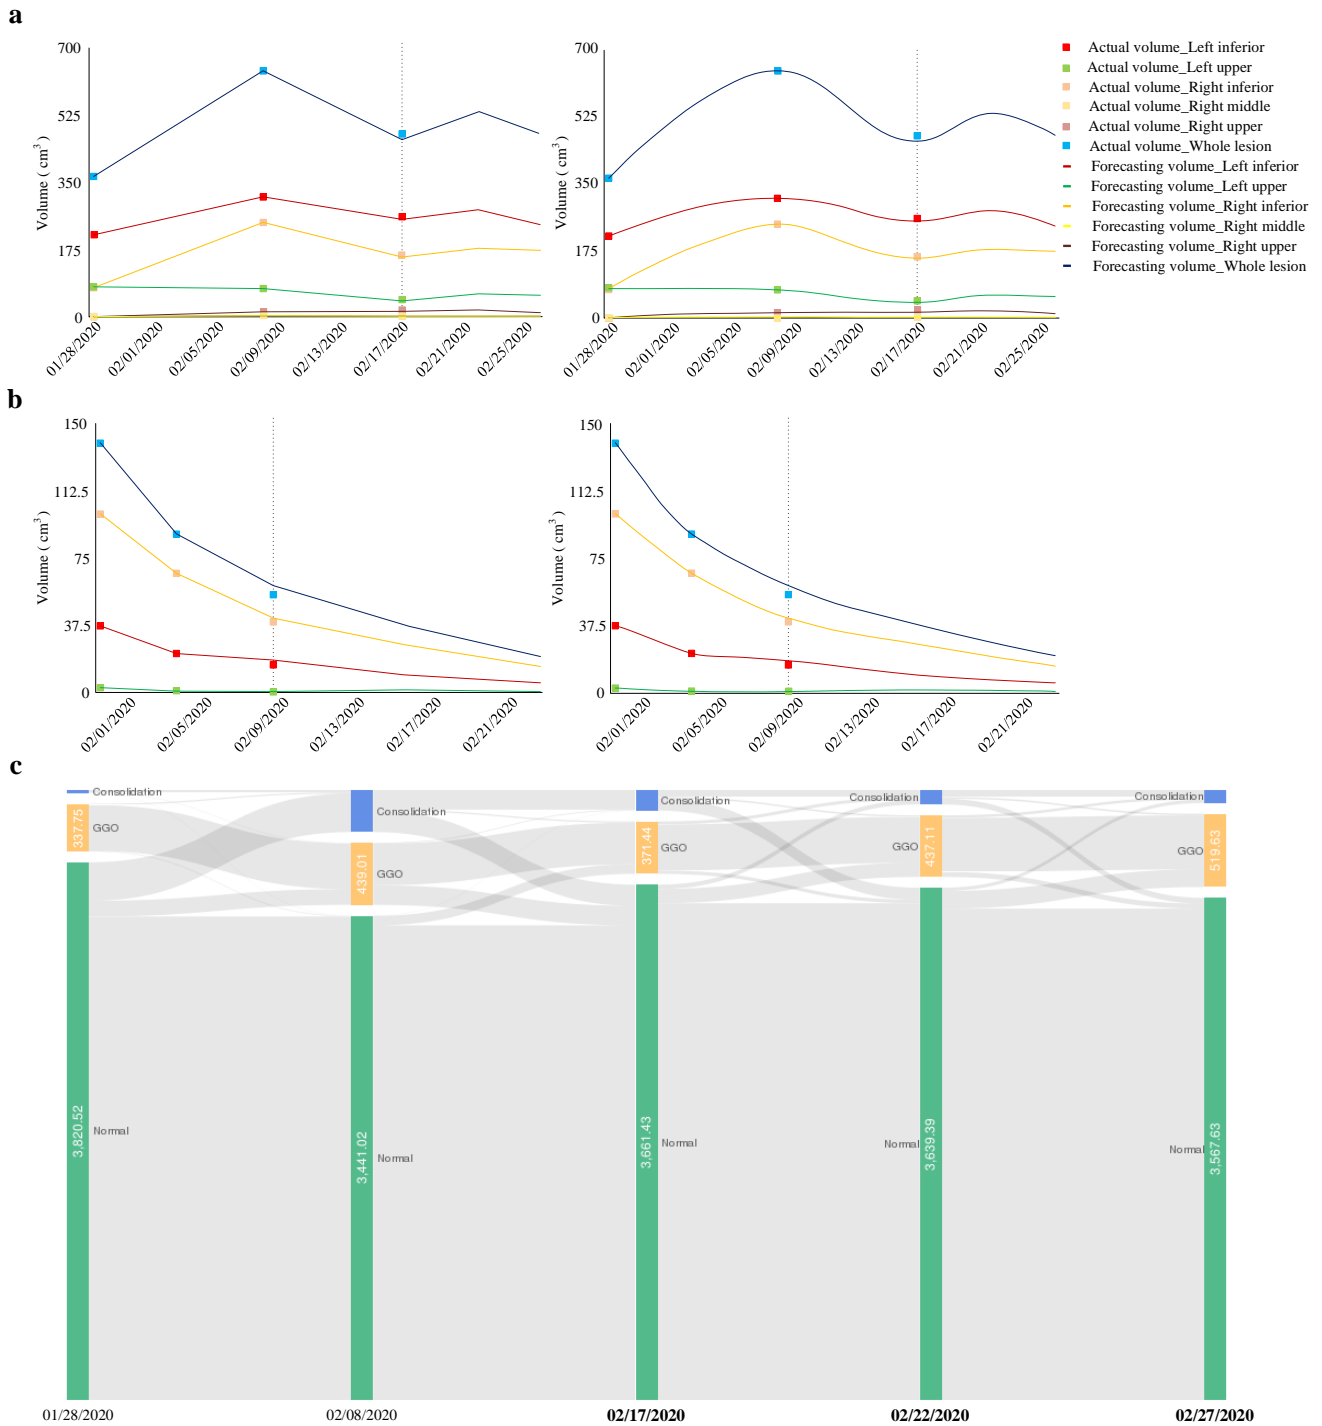

**Figure 4. Comparison of simulation and actual trends of lesion development in five pulmonary lobes. According to the development of lesions in the early stages, the forecast system further predicts the trend of lesion development in the next 5 and 10 days from the 3<sup>rd</sup> CT examination for severe patient and the next 7 and 14 days from the 3<sup>rd</sup> CT examination for non-severe patient. a. The development of recurrent lesions in severe patient; b. The gradually vanishing of multiple lesions in non-severe patient; c. Sankey diagram for the forecast of development of pulmonary lesions of severe patient. In a and b, Light colored dots and long dark lines in each group represent actual and simulated trends of the whole lesion development in the same area, respectively. The plots on the right are smoothed version. No obvious lesion was found in the right upper or middle lobe for non-severe patient. In c, the transition classes are designated as: Normal, GGO, Consolidation.**

**a**

Normalized feature importance of driven factors utilized in RF+CA

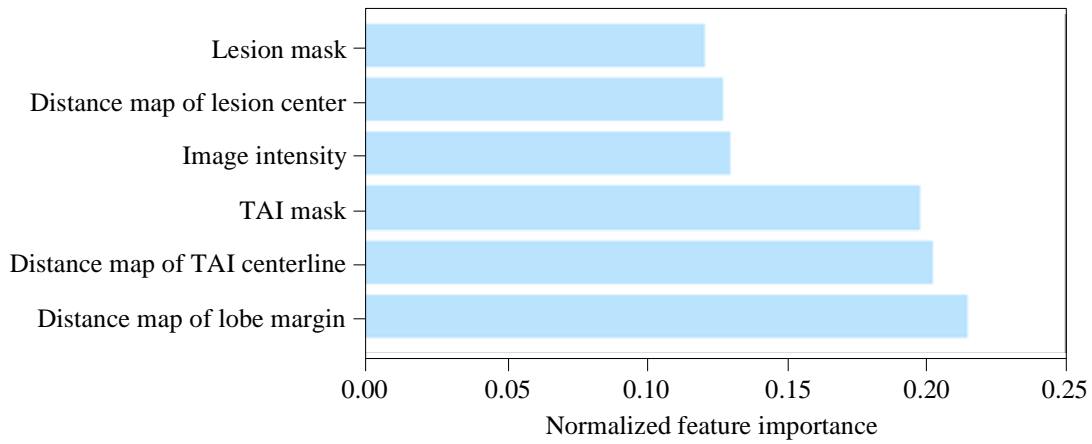

**b**

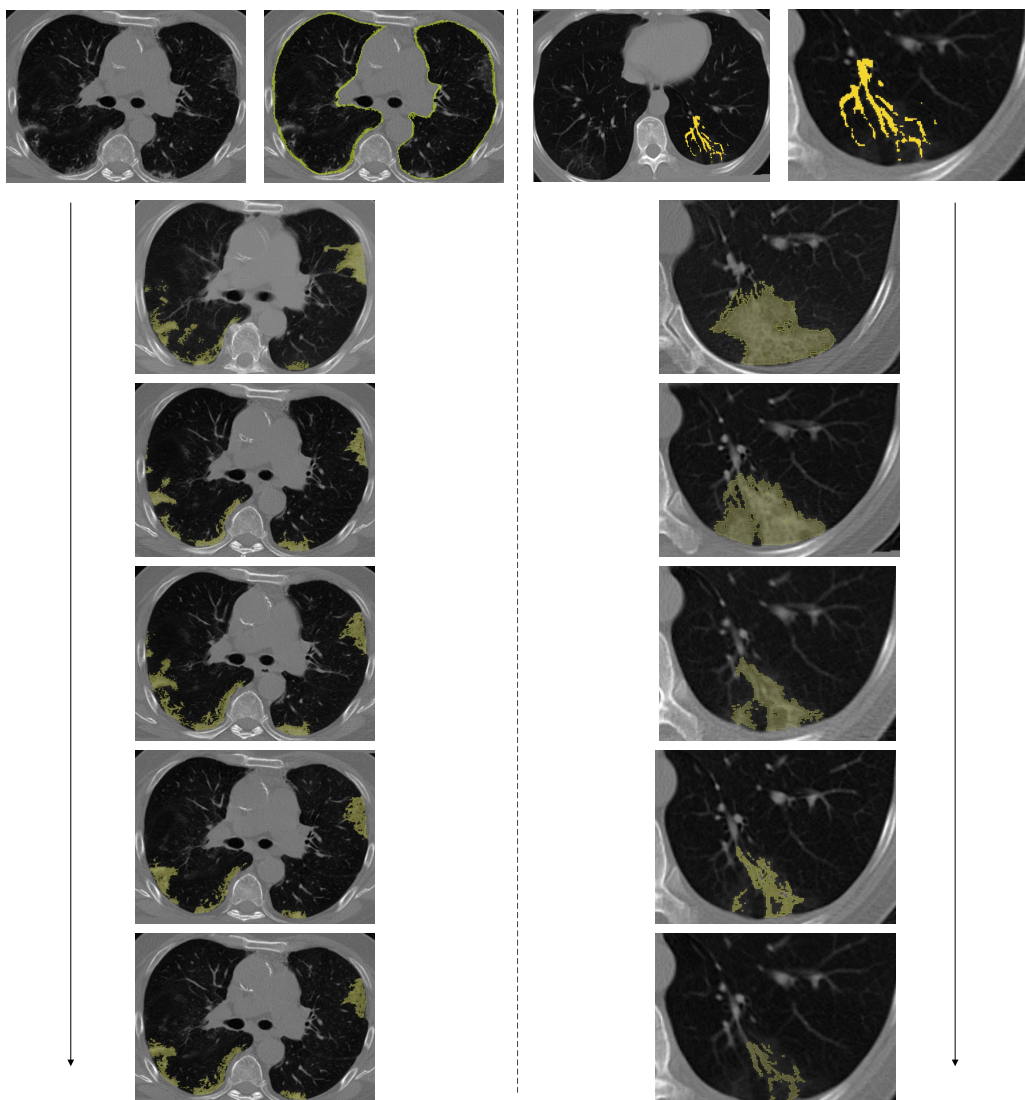

**Figure 5. Driving factor of lesion development in patients with COVID-19.** **a.** Measurement of importance of each driving factor. TAI denotes various tubular adjacent interstitials, which included bronchial bundles, vascular bundles, central lobular stroma etc. **b.** In the images on the left, lesions are mainly scattered around the peripheral areas of lungs. In the images on the right, lesions grow along TAI.



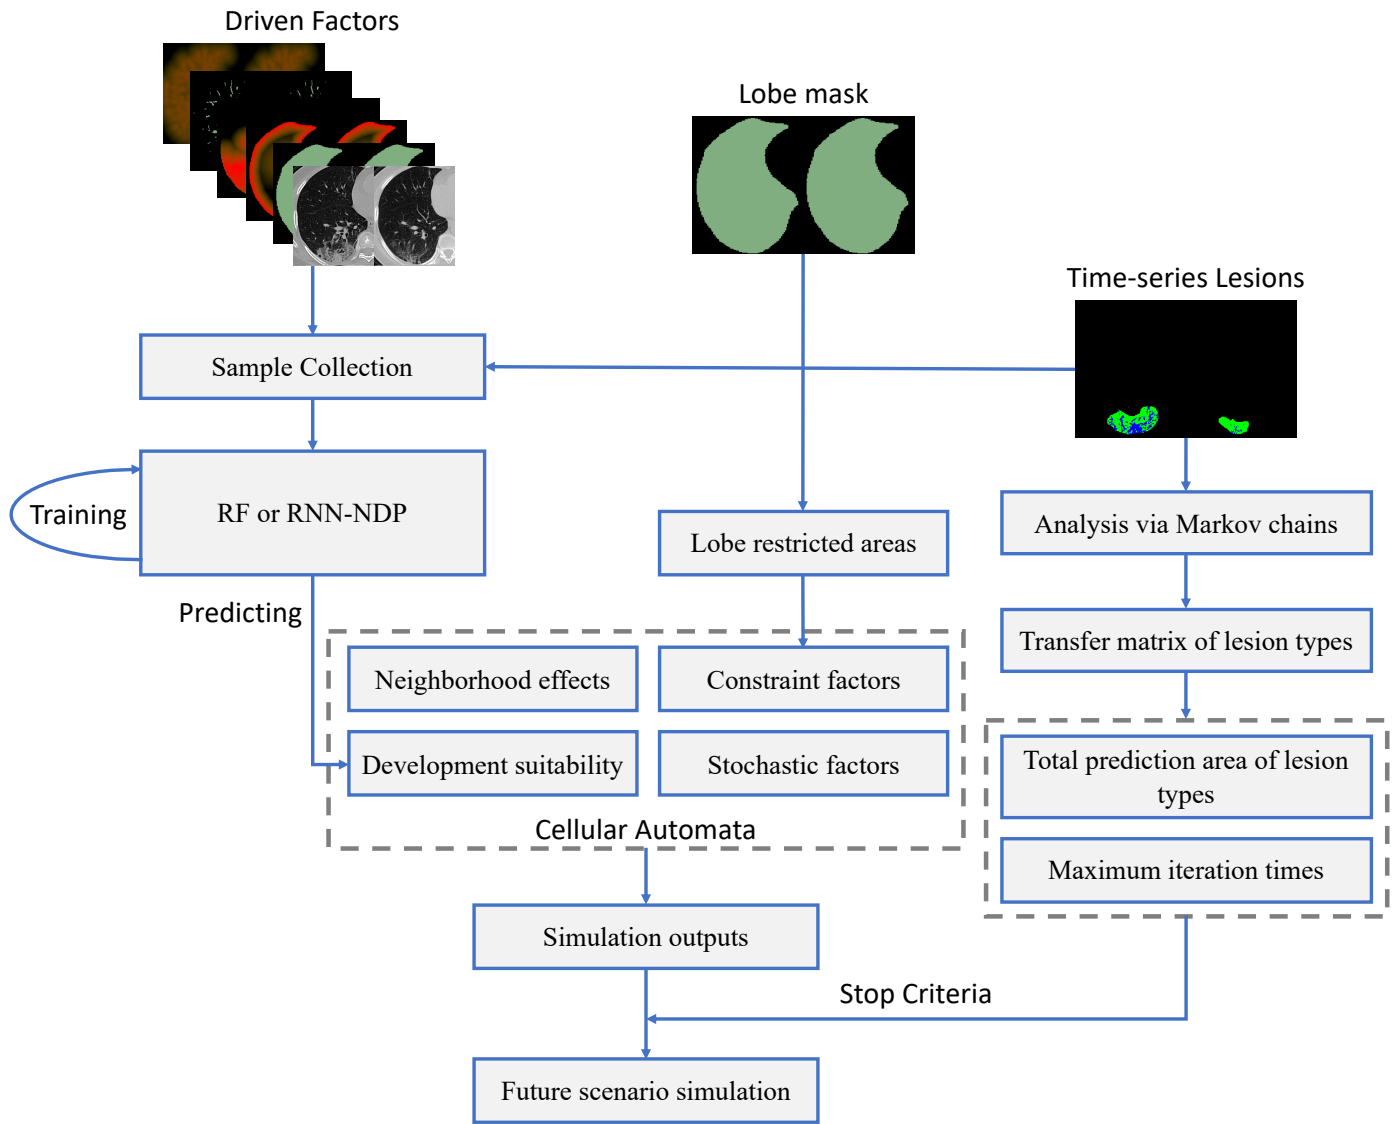

**Extended data | Figure 1. The flowchart of lesion evolution simulation via the CA based forecasting system.**

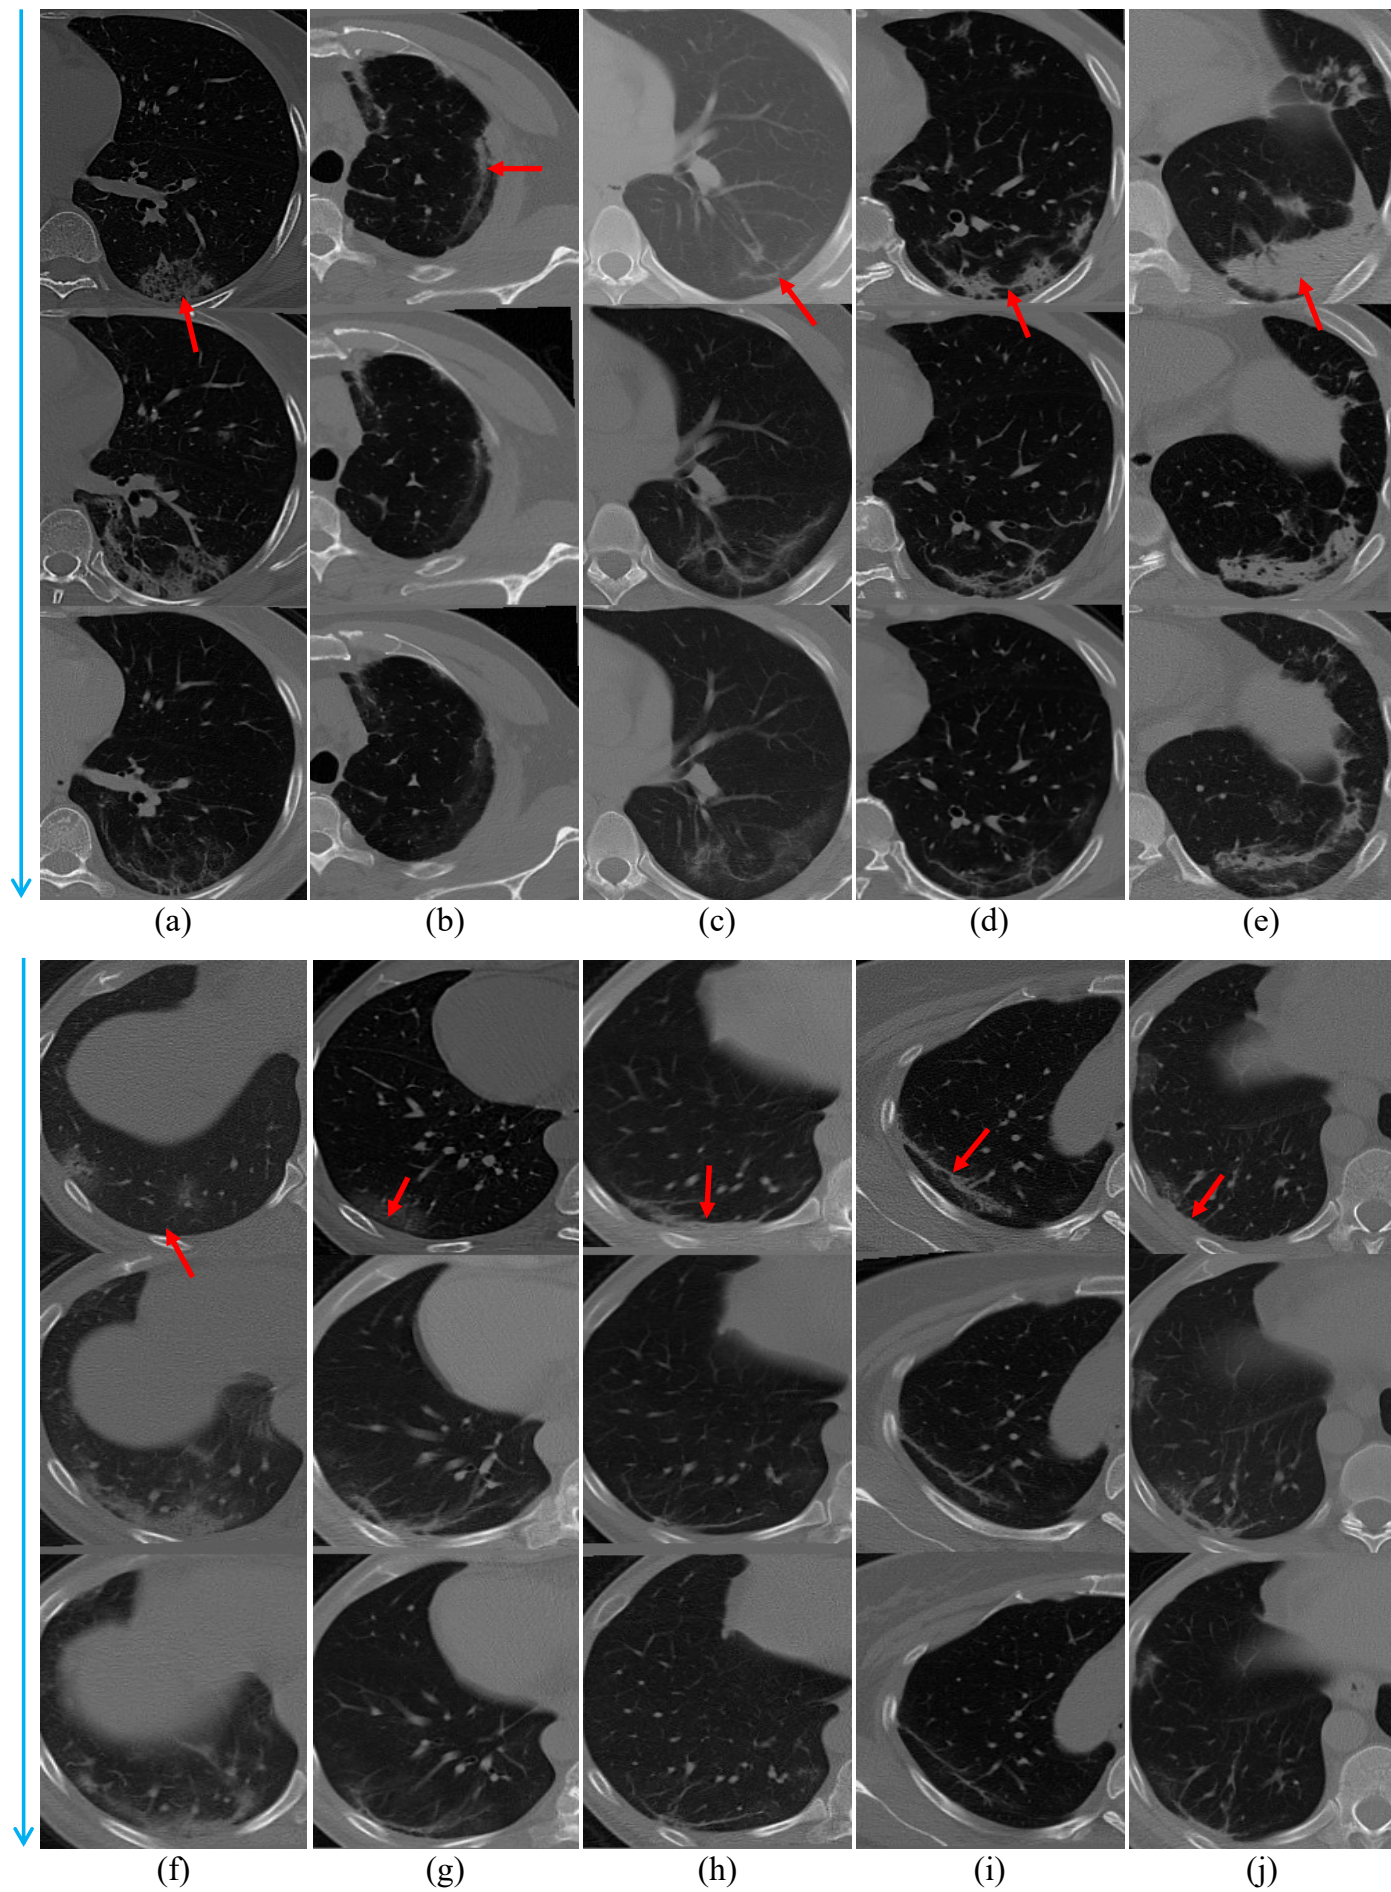

**Extended data | Figure 2. Multi-stage samples where lesion develops below the subpleural and along some vessels.** The red arrows point to the lesions. Each case contains 3 stages, forward from top to bottom (blue arrow).

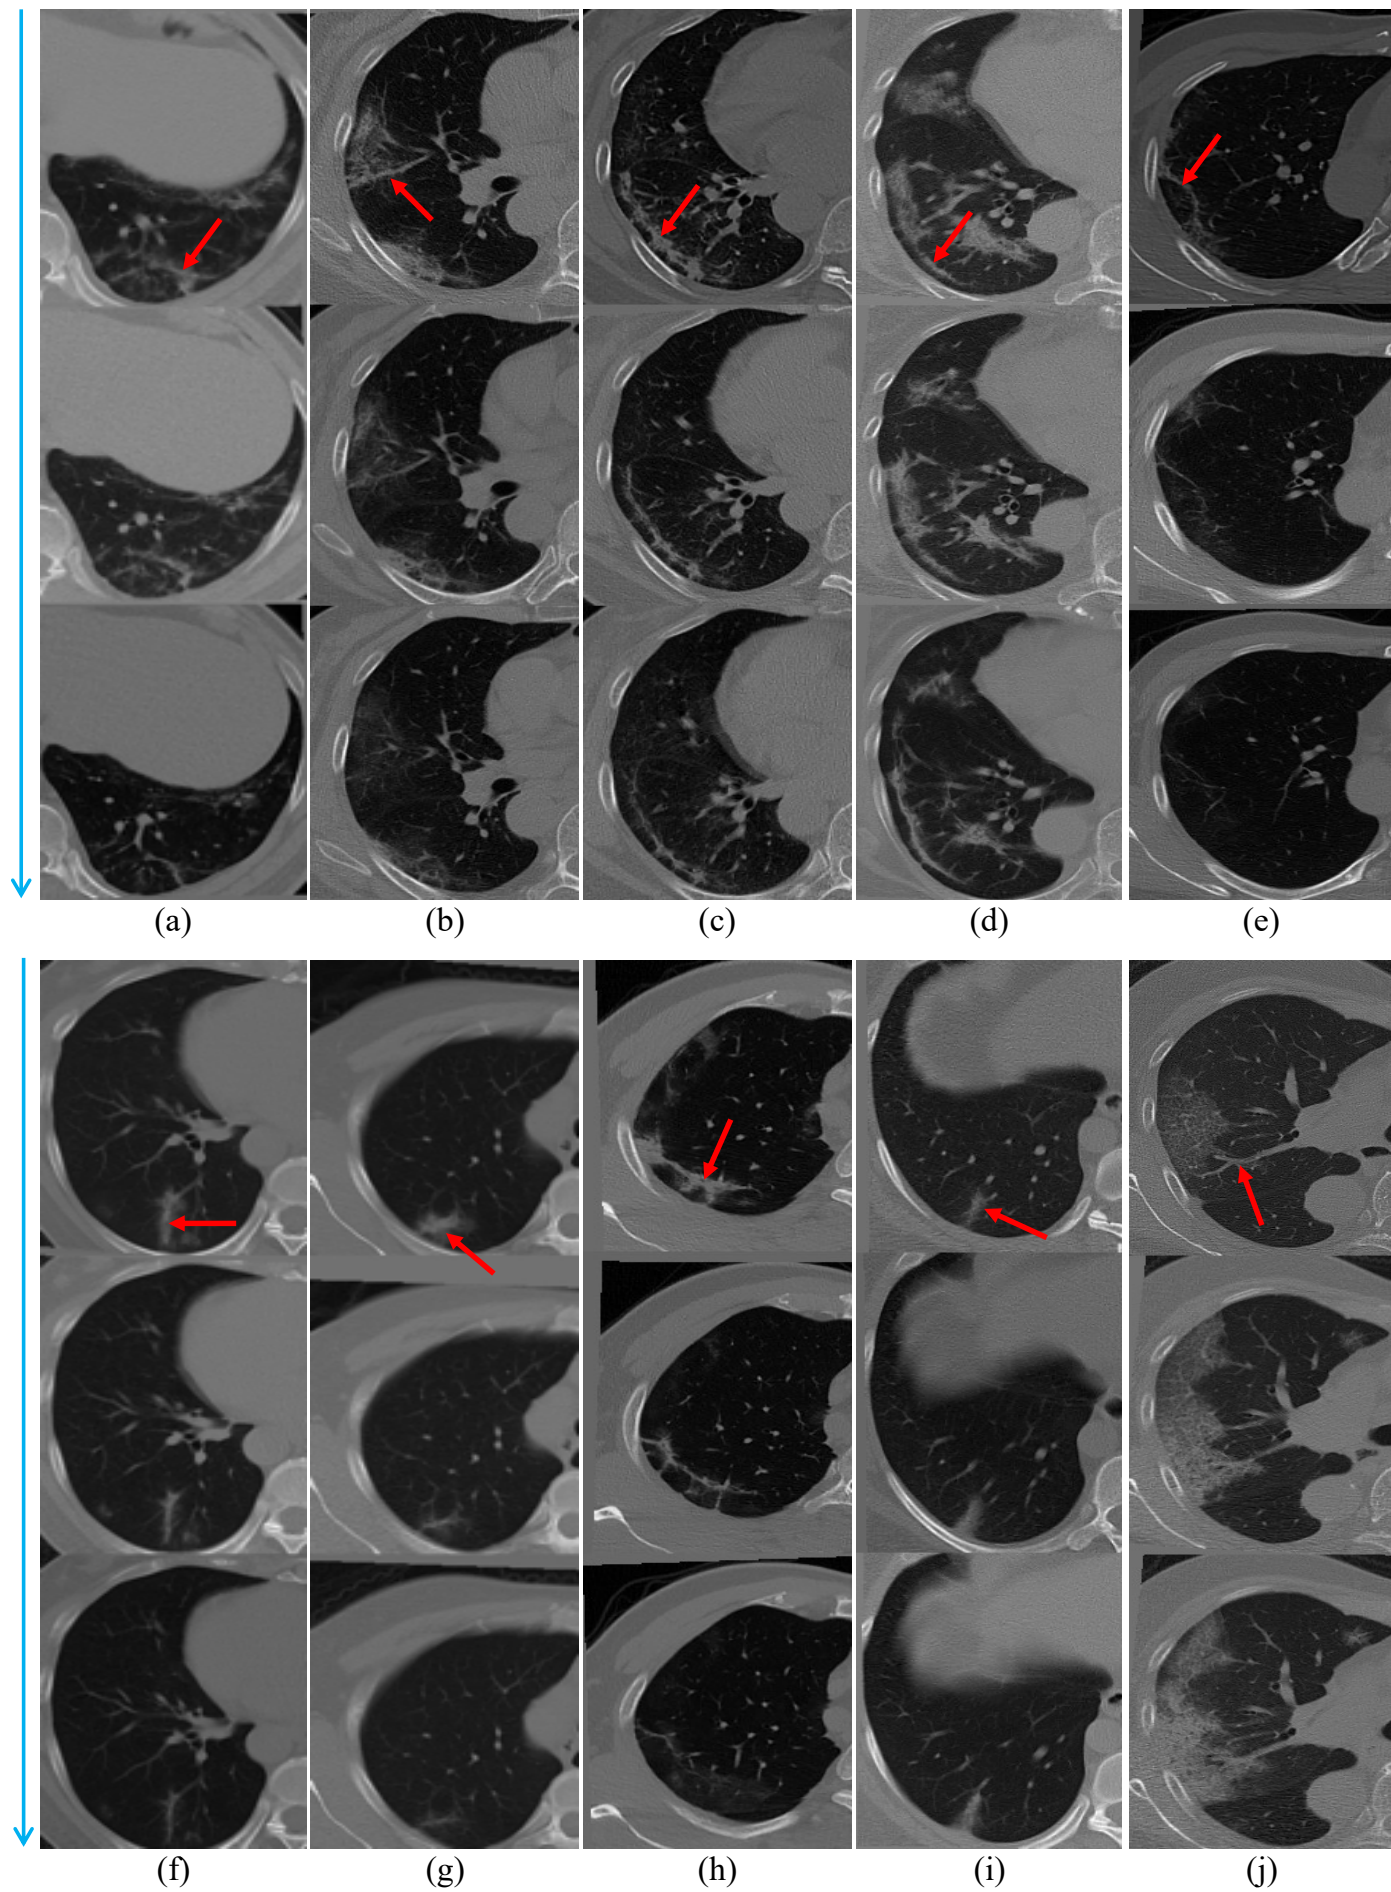

**Extended data | Figure 3. Multi-stage samples where lesion develops along the tubular adjacent interstitials (TAI).** The red arrows point to the lesions. Each case contains 3 stages, forward from top to bottom (blue arrow).
